1 Sexual segregation in a highly pagophilic and sexually dimorphic

2 marine predator

3

4

5 Christophe Barbraud<sup>1</sup>, Karine Delord<sup>1</sup>, Akiko Kato<sup>1</sup>, Paco Bustamante<sup>2</sup>, Yves Cherel<sup>1</sup>

6

7

8 <sup>1</sup> *Centre d'Etudes Biologiques de Chizé, UMR 7372 du CNRS-Université de La Rochelle,*

9 *79360 Villiers-en-Bois, France*

10 <sup>2</sup> *Littoral Environnement et Sociétés (LIENSs), UMR 7266, CNRS-Université de La Rochelle,*

11 *2 rue Olympe de Gouges, 17000 La Rochelle, France*

12

13

14

15

16

17

18

19

20

21

22

23

24

25

26 **Abstract** : Sexual segregation is common in many species and has been attributed to intra-  
27 specific competition, sex-specific differences in foraging efficiency or in activity budgets and  
28 habitat choice. However, very few studies have simultaneously quantified sex-specific  
29 foraging strategies, at sea distribution, habitat use, and trophic ecology. Moreover, these  
30 studies come from low latitude areas reflecting a lack of evidence for polar species. We  
31 investigated sexual segregation in snow petrels *Pagodroma nivea* and combined movement,  
32 foraging trip efficiency, stable isotope and oceanographic data to test whether sexual  
33 segregation results from sex-specific habitat use. Breeding birds foraging in the Dumont  
34 d'Urville sea, Antarctica, were tracked during incubation. Space-use sharing and utilization  
35 distribution were similar between males and females indicating no spatial segregation. Males  
36 and females foraged more in waters  $\approx 400$  m deep and less in waters deeper than  $\approx 1000$  m.  
37 There was no difference in  $\delta^{13}\text{C}$  values between males and females. Females foraged less than  
38 males in areas with higher sea ice concentration (SIC  $>70\%$ ) and had lower  $\delta^{15}\text{N}$  values in  
39 plasma, blood cells and feathers. Male and female foraging trip performances (trip duration,  
40 length, speed and directions, mass gain, proportion mass gain) were similar, but foraging  
41 efficiency (proportionate daily mass gain while foraging), was greater for females than for  
42 males, and was greater for larger females with deeper bills. Females were more efficient than  
43 males during short ( $<2$  days) foraging trips. For females, but not for males, mass gain,  
44 proportion mass gain and body condition at return from a foraging trip were positively  
45 correlated to SIC of the foraging areas. Together, these results indicate that sexual segregation  
46 in snow petrels during incubation is mainly driven by habitat segregation between high  
47 ( $>70\%$ ) more profitable SIC and low SIC areas, probably driven by intra-specific competition.  
48  
49 **Keywords** : bio-logging, competition, foraging, isotopic niche, *Pagodroma nivea*, sea ice  
50 concentration, snow petrel

51

## 52 **1 Introduction**

53 Sexual segregation occurs in a many living animals including invertebrates (Hochkirch et al.  
54 2007, Romey & Wallace 2007) and vertebrates (Ruckstuhl & Neuhaus 2005, Wearmouth &  
55 Sims 2008) but also in plants (Harder et al. 2000). Investigating sexual segregation is of  
56 particular relevance from a fundamental point of view to understand how and why the sexes  
57 differentially distribute themselves and the consequences on population processes and  
58 dynamics. It is also relevant from a management and conservation point of view since sex  
59 specific distribution influences overlap with spatial distribution of human activities and/or  
60 contamination gradient (Carravieri et al. 2014). Two main concepts have been proposed to  
61 describe sexual segregation: social segregation, where males and females tend to form single-  
62 sex groups within the same or homogeneous habitat; and habitat segregation, where males and  
63 females use different habitats within a home range and with habitats differing in their amount  
64 or quality of forage distributed heterogeneously or patchily (Conradt 2005, Ruckstuhl 2007).  
65 Both social aggregation and habitat segregation can or cannot lead to spatial or temporal  
66 segregation, which can be considered as auxiliary concepts (Conradt 2005, Ruckstuhl 2007).

67 Several hypotheses have been proposed to explain social segregation and habitat  
68 segregation (Conradt 2005, Ruckstuhl 2007, Wearmouth & Sims 2008). In solitary animals,  
69 social segregation is unlikely to occur since by definition a single animal is not social  
70 (Conradt 1998, Neuhaus & Ruckstuhl 2004), except perhaps in rare cases (Martin & Da Silva  
71 2004). Four main hypotheses explain habitat segregation in solitary species (Ruckstuhl 2007,  
72 Wearmouth & Sims 2008). The predation-risk hypothesis proposes sexual differences in risk  
73 of predation and in reproductive strategies. According to this hypothesis males select high-  
74 risk, high-energy gain habitats, whereas females trade off food quality of the habitat in favor  
75 of safety to them and their offspring (Main et al. 1996). The, which incorporates the scramble

76 competition hypothesis, suggests sex differences in nutritional requirements linked to sex-  
77 specific differences in body size (Gross 1998). The larger sex individuals select habitats  
78 where intake rates are high whereas the smaller sex individuals are constrained to sites where  
79 they can obtain a high-quality food (Beier 1987, Barboza & Bowyer 2000). Alternatively, one  
80 sex may forage more efficiently, thus outcompeting and excluding the other (scramble-  
81 competition hypothesis or intersexual competition hypothesis) (Clutton-Brock et al. 1987).  
82 The activity-budget hypothesis, initially developed for group-living species, was extended to  
83 solitary species and to species with unequal reproductive investment (Wearmouth & Sims  
84 2008). This hypothesis proposes that sex differences in activity budgets will increase with  
85 divergence in the body size of the sexes. Therefore, the sex-specific energy requirements will  
86 result in sex-specific habitat used due to allometric relationships between body size and  
87 metabolic rate. Finally, the thermal niche-fecundity hypothesis assumes that fecundity is  
88 temperature dependent and that sex differences occur in the temperature at which fecundity is  
89 maximized. This last hypothesis is restricted to ectotherms (Sims 2005).

90 Sexual segregation has been widely studied among terrestrial animals, particularly  
91 mammals, but only relatively recently in marine organisms (Wearmouth & Sims 2008). Yet,  
92 despite an ongoing interest in sexual segregation in marine animals such as seabirds and  
93 marine mammals (Lewis et al. 2002, Elliott et al. 2010, Phillips et al. 2011, Mancini et al.  
94 2013, Baylis et al. 2016, Kernaléguen et al. 2016), the underlying causes and the mechanisms  
95 driving habitat segregation remain poorly understood. In addition, very few studies focused  
96 on between-sex differences in habitat segregation in relation to dynamic oceanographic  
97 features (Pinet et al. 2012, Cleasby et al. 2015, Paiva et al. 2017), thereby limiting our ability  
98 to distinguish between the concurrent sexual segregation hypotheses. Moreover, these studies  
99 come from temperate or tropical areas reflecting a lack of evidence for polar species.  
100 However, foraging strategies may differ between polar, temperate and tropical oceanographic

101 environments, at least in seabirds (Baduini & Hyrenbach 2003, Weimerskirch 2007).  
102 Furthermore, for practical, technical and ethical reasons most studies that have investigated  
103 sexual segregation on marine animals have focused on large species (Phillips et al. 2011),  
104 complicating the possibility to discriminate between the various hypotheses proposed to  
105 explain sexual segregation.

106 In this study we aimed to quantify sexual differences in the foraging strategies, at sea  
107 distribution, habitat use, and trophic ecology of a sexually dimorphic polar seabird, the snow  
108 petrel, *Pagodroma nivea*, during the incubation period. Snow petrels are endothermic animals,  
109 therefore excluding the thermal niche-fecundity hypothesis as an explanatory hypothesis.  
110 Since predation on this species is occasional and no sex-specific predation is known to occur  
111 (Barbraud 1999), the predation-risk hypothesis can be discounted. Therefore, both the forage-  
112 selection hypothesis and the activity budget hypothesis can be highlighted as possible  
113 mechanisms for segregation in this species. There is considerable overlap between the forage-  
114 selection hypothesis and the activity-budget hypothesis, complicating our ability to make  
115 clear predictions to distinguish between the two, and to estimate the relative support of each  
116 hypothesis (Wearmouth & Sims 2008). Nevertheless, using GPS tracking data, isotopic data  
117 and environmental data we addressed the following main questions: (1) do female snow  
118 petrels differ from males in their foraging tactics, distribution and habitat use; (2) how are  
119 body reserves regulated during incubation in the two sexes; and (3) do sex-specific  
120 morphological characteristics influence foraging efficiency? Based on results from  
121 comparative studies suggesting that dimorphic seabird species from polar/temperate regions  
122 are more prone to show trophic or spatial segregation than dimorphic species from the tropics  
123 (Mancini et al. 2013), and on a relationship between sexual segregation in diet and sexual size  
124 dimorphism in seabirds (Phillips et al. 2011), we predicted sexual segregation in diet and/or

125 spatial segregation in the snow petrel, which is one of the most sexually dimorphic seabird  
126 species (Croxall 1982, Fairbairn & Shine 1993).

127

## 128 **2 Material and methods**

### 129 **2.1 Study species**

130 The snow petrel is endemic to Antarctica and the Southern Ocean, with a circumpolar  
131 breeding distribution (Croxall et al. 1995). It is a specialist forager and ship-based  
132 observations indicate that this is the most pagophilic species amongst flying seabirds,  
133 occurring only where there is some degree of sea ice cover (Griffiths 1983, Ainley et al. 1984,  
134 1986), generally within the marginal ice zone and areas of heavy ice concentrations ((Ainley  
135 et al. 1992, 1993). Snow petrels forage by flying rapidly along the edges of ice floes, ice  
136 shelves and icebergs in search of its prey (Ainley et al. 1984). The species feeds primarily on  
137 fish, including the myctophid *Electrona antarctica* in oceanic waters and the pelagic  
138 nototheniid *Pleuragramma antarctica* (Antarctic silverfish) in neritic waters; they prey also  
139 upon swarming crustaceans, the Antarctic (*Euphausia superba*) and ice (*E. crystallophias*)  
140 krill, and the hyperiid amphipod *Themisto gaudichaudii* (Ainley et al. 1984, 1991, Ridoux &  
141 Offredo 1989, Van Franeker & Williams 1992, Ferretti et al. 2001). At Pointe Géologie  
142 (Adélie Land), undetermined fish dominated the chick diet in 1982 (Ridoux & Offredo 1989)  
143 and fish items identified in 1994 were all Antarctic silverfish (authors' unpublished data). Prey  
144 are caught by dipping and surface-seizing (Harper et al. 1985) generally on the wing but also  
145 by ambush feeding (Ainley et al. 1984).

146 Snow petrels breed in crevices and under boulders. Adult birds arrive at the colonies in  
147 late October to copulate before departing at sea for a two to three week pre-laying exodus, and  
148 females lay a single egg in early December (Mougin 1968, Isenmann 1970). Incubation lasts  
149  $\approx$ 44 days on average during which males and females alternately incubate their egg until

150 hatching (Brown 1966, Barbraud et al. 1999). After hatching the chick is guarded by parents  
151 alternating short spells until it attains homeothermy. Then the chick is left unattended and  
152 regularly fed by both parents until fledging, which occurs on average  $\approx 47$  days after hatching.  
153 Adults leave the colony during the first two weeks of March before dispersing at sea where  
154 they remain in the sea ice zone during the non-breeding period (Delord et al. 2016).

155

## 156 **2.2 Fieldwork**

157 Fieldwork was carried out at Ile des Pétrels (66°40'S, 140°01'E), Pointe Géologie  
158 archipelago, Adélie Land, East Antarctica, between 7 December 2015 and 17 January 2016.  
159 This corresponds to the incubation period. On average 550 pairs of snow petrels breed on Ile  
160 des Pétrels in dense colonies or in loosely aggregated nests (CEBC-CNRS unpublished data).  
161 By daily visits at 36 nests, we studied laying dates and the duration of the foraging trips and  
162 incubation shifts of 36 males and 36 females until hatching. Incubating birds were identified  
163 using their metal ring number. Sixty five snow petrels ( $n = 36$  females and  $n = 29$  males) were  
164 tracked with GPS loggers (nanoFix-Geo; PathTrack Limited, UK) during the incubation  
165 period. We tracked only one foraging trip per bird to minimize disturbance and to ensure  
166 independence between trips. The devices weighed 2.2 g, which represented between 0.5% and  
167 0.8% of the birds' mass, thus well below the 3% threshold advised by Phillips et al. (2003).  
168 Birds were manually captured at the nest and weighted ( $\pm 5$  g) in a bag with a Pesola spring  
169 balance before being equipped with a GPS. The birds were initially sexed by vocalization  
170 when approached on the nest and handled (male calls have a lower pitch and a lower rhythm  
171 than those of females (Guillotin & Jouventin 1980, Barbraud et al. 2000). GPS units were  
172 deployed on birds about to leave for a foraging trip (i.e. when both partners were at the nest)  
173 and were attached to the two central tail feathers using Tesa® tape. The GPS recorded  
174 locations at 15, 30, 40 or 60 min intervals. Several intervals (15 min,  $n = 15$ ; 30 min,  $n = 4$ ; 40

175 min, n = 43; 60 min, n = 3) were tested to estimate the minimum interval frequency that  
176 allowed the GPS battery to last for a complete foraging trip. Birds were recaptured on the day  
177 they returned to the nest following their foraging trip, weighed, measured (wing length  $\pm$  1  
178 mm with a ruler, tarsus length, bill length, and bill depth  $\pm$  0.1 mm with calipers) and the  
179 loggers were recovered. All birds were recaptured but three birds lost their GPS during the  
180 foraging trip. Data from all other GPS (n = 62) were retrieved successfully.

181

### 182 **2.3 Tissue sampling, molecular sexing and stable isotopes**

183 Adults equipped with GPS and 24 additional individuals (11 females and 13 males) were  
184 sampled during incubation for stable isotope and molecular sexing analyses. A blood sample  
185 from the alar vein was taken immediately after capture of the bird upon return from a foraging  
186 trip using a 1-mL heparinized syringe and a 25-gauge needle and maintained at 4°C until  
187 being processed. Collected blood volumes ranged from 0.50 to 0.80 mL. Blood samples were  
188 separated into plasma and blood cells by centrifugation at 12,000 rpm for 5 min, within 2-3  
189 hours of sampling and stored frozen at -20°C until analyses at the laboratory. For each  
190 individual, 6 whole body feathers were pulled out from the upper chest and stored dry in  
191 sealed individual plastic bags for stable isotope analysis.

192 From a subsample of blood cells, the sex was determined by polymerase chain reaction  
193 amplification of part of two highly conserved genes present on the sex chromosomes as  
194 detailed in Weimerskirch et al. (2005).

195 Stable carbon ( $\delta^{13}\text{C}$ ) and nitrogen ( $\delta^{15}\text{N}$ ) isotope ratios in the blood cells, plasma and  
196 body feathers of snow petrels were determined to investigate the trophic choices of each sex  
197 and consistency over time of their foraging niche. The isotopic method was validated in the  
198 Southern Ocean for several seabird species:  $\delta^{15}\text{N}$  values mainly define the trophic position,  
199 with values increasing with trophic level (Cherel et al. 2010), and  $\delta^{13}\text{C}$  values indicate the



200 latitude of the foraging habitat (Cherel & Hobson 2007, Jaeger et al. 2010). Plasma has a half-  
201 life of about 3 days (Hobson & Clark 1993), a shorter period than the average duration of  
202 foraging trip during incubation ( $\approx 7$  days, Barbraud et al. 1999), and represents prey ingestion  
203 and trophic ecology during the last trip before sampling (Cherel et al. 2005a). Blood cells  
204 have a half-life of about 30 days (Hobson & Clark 1993) and represent dietary information  
205 integrated over a few months. Feathers contain dietary information at the time they were  
206 grown, because keratin is inert after synthesis (Hobson & Clark 1992, 1993, Bearhop et al.  
207 2002). In snow petrels body moult is a gradual process extending over at least 4 months in  
208 summer and autumn. It begins during incubation, but most body feathers grow in the weeks  
209 following completion of breeding, i.e. from February to April (Maher 1962, Beck 1969).  
210 Therefore, isotopic values of body feathers contain information about diet near the end of the  
211 previous breeding season and the beginning of the previous non-breeding season.

212 Feathers (one single feather per bird) were cleaned to remove surface contaminants using  
213 a 2:1 chloroform:methanol solution followed by two methanol rinses. They were then oven  
214 dried for 48 h at 50°C and cut into small pieces using stainless steel scissors. Blood cells and  
215 plasma samples were freeze-dried and powdered. Since avian plasma, unlike blood cells,  
216 contains a high and variable lipid content that affect its  $\delta^{13}\text{C}$  values, lipids were removed from  
217 plasma samples using chloroform/methanol (Cherel et al. 2005a, Cherel et al. 2005b). Then,  
218 tissue sub-samples were weighed with a microbalance (aliquots mass:  $\approx 0.3$  mg dw), packed  
219 in tin containers, and nitrogen and carbon isotope ratios were subsequently determined at the  
220 laboratory LIENSs by a continuous flow mass spectrometer (Thermo Scientific Delta V  
221 Advantage) coupled to an elemental analyser (Thermo Scientific Flash EA 1112). Results are  
222 presented in the usual  $\delta$  notation relative to Vienna PeeDee Belemnite and atmospheric  $\text{N}_2$  for  
223  $\delta^{13}\text{C}$  and  $\delta^{15}\text{N}$ , respectively. Replicate measurements of internal laboratory standards

224 (acetanilide and peptone) indicate measurement errors  $<0.15$  ‰ for both  $\delta^{13}\text{C}$  and  $\delta^{15}\text{N}$   
225 values.

226

## 227 **2.4 Foraging analysis and spatial usage**

228 Spatial and statistical analyses were performed using R 3.2.1 using the “stats” package (R  
229 Development Core Team 2015) and “*adehabitatLT*” package (Calenge 2006, Calenge et al.  
230 2009). From the GPS recorded data, foraging trips were reconstructed and data were  
231 discretized to have one location each 40 min. Some of the trips were largely incomplete  
232 (return journey not initiated;  $n = 15$  corresponding to the 15 min intervals) because of battery  
233 limitations and were removed from the analysis. For each complete ( $n = 40$ ) and incomplete  
234 (return journey initiated;  $n = 7$ ) foraging trip, we computed the following foraging indices:  
235 maximum distance to the colony ( $D_{max}$ , km), average movement speed ( $MS$ ,  $\text{km h}^{-1}$ ) and  
236 daily distance covered ( $D_{day}$ ,  $\text{km d}^{-1}$ ). For each complete trip, we calculated the additional  
237 following metrics: total distance travelled ( $D_{total}$ , km) and trip duration ( $T$ , h). Spatial  
238 distribution of snow petrels was investigated by producing utilization distributions (UDs 25%,  
239 50%, 75% and 95%; Worton 1989) for each individual, using kernel analysis with a cell size  
240 of  $0.1^\circ \times 0.1^\circ$  and a smoothing parameter ( $h$ ) that was estimated using the ad hoc method href.  
241 Grid cell size was based on the mean accuracy of the devices ( $\approx 10$  m), the mean maximum  
242 speed of flying snow petrels (see Results) and on the time interval between two GPS locations  
243 (40 mn). To investigate whether space use differed between sexes, we calculated observed  
244 overlaps in each UD representing the high core (25%), core (50%), middle (75%) and general  
245 (90%) use areas using utilization distribution overlap index (UDOI), which is the most  
246 appropriate measure of quantifying similarity among UD estimates (Fieberg & Kochanny  
247 2005). The extent of overlap between male and female home ranges was estimated using  
248 Bhattacharyya’s affinity (BA), which ranges from 0 (no overlap) to 1 (complete overlap).

249 Using these metrics we performed a randomization procedure to test the null hypothesis that  
250 there was no difference in the spatial distribution of males and females at the population level  
251 (Breed et al. 2006). The sex of each bird was randomly assigned using the observed sex ratio  
252 in our data set and the overlap metric between males and females was calculated for 25%,  
253 50%, 75% and 95% kernels. We performed 1000 randomizations of our dataset from which  
254 the probability of accepting the null hypothesis was calculated as the proportion of random  
255 overlaps that were smaller than the observed overlap. Since we were testing only if the  
256 observed overlap was smaller than random overlap, we considered this as a one-tailed test.  
257 Second, we tested the null hypothesis that there was no difference in the extent of overlap in  
258 spatial distribution of males and females at the individual level.

259 For each foraging trip we also calculated the following metrics from the phenotypic data:  
260 the body mass change ( $\Delta m$ , in g) between departure and arrival of a foraging trip, the daily  
261 mass gain ( $M_{day}$ , in  $g \cdot day^{-1}$ ) calculated as the ratio between  $\Delta m$  and the trip duration, the  
262 proportion mass gain calculated as the ratio between  $\Delta m$  and mass at departure for a foraging  
263 trip, and the proportion daily mass gain calculated as the ratio between  $M_{day}$  and mass at  
264 departure for a foraging trip. A body condition index before departure and after return from a  
265 foraging trip was also calculated. To estimate the body condition we used the body  
266 measurements to calculate the scale mass index (SMI) as recommended by Peig and Green  
267 (2009, 2010). The SMI adjusts the mass of all individuals to that expected if they had the  
268 same body size. We used the score of the first axis of a principal component analysis (PC1)  
269 combining wing, bill, tarsus lengths and bill depth to characterize body size. PC1 accounts for  
270 70.9% of the total variance and all measurements are highly correlated with PC1 (Pearson's  $r$   
271  $> 0.80$ ;  $P < 0.001$ ). The SMI was calculated for each individual  $i$  according to the formula:

$$SMI_i = M_i * \left( \frac{L_0}{L_i} \right)^b$$

272 where  $M_i$  and  $L_i$  are, respectively, the body mass and the PC1 score of the individual  $i$ ,  $L_0$ , is  
273 the value of PC1 for the whole studied population and  $b$  the slope estimate of the RMA  
274 (Reduced Major Axis) regression of log-transformed body mass on log-transformed PC1.

275

## 276 **2.5 Foraging habitat covariates**

277 To investigate the foraging habitats used by males and females, the tracking locations were  
278 categorized as occurring during commuting (outward and inward) or foraging (middle) stage  
279 of foraging trips, as commonly used for central-place foragers. Among Procellariiformes the  
280 distinction between these stages varies greatly between species and breeding stages  
281 (Weimerskirch et al. 1997, Phillips et al. 2009). Moreover, at the individual level defining  
282 objectively the transition between such behaviors may prove to be difficult (Phillips et al.  
283 2009, Wakefield et al. 2009). To avoid this pitfall, we applied the method used by Wakefield  
284 et al. (2009) and Phillips et al. (2009) to determine the stage of the trips at which the  
285 transitions occurred at the population level. For each location within a foraging trip the ratio  
286  $d_{col}/D_{max}$  was calculated, where  $d_{col}$  is the distance from the colony and  $D_{max}$  is the maximum  
287 distance from the colony reached during that trip. The ratio  $t/T$  was also calculated, where  $t$  is  
288 the time elapsed since the beginning of the trip and  $T$  is the total trip time. Then, the total  
289 variance in  $d_{col}/D_{max}$  for all locations occurring before  $t/T$  was plotted against  $t/T$ . The point of  
290 inflexion of this curve was determined as well as the value of  $t/T$  at this point. Tracking  
291 locations recorded before this point were classified as those corresponding to the outward trip.  
292 Similarly, the total variance in  $d_{col}/D_{max}$  occurring after  $t/T$  was plotted against  $t/T$  and the  $t/T$   
293 value from which a monotonic decrease of the variance began was recorded. Tracking  
294 locations recorded after this point were classified as those corresponding to the return trip, and  
295 locations between both points were considered as foraging locations.

296 Previous studies have shown that the snow petrel is a sea ice obligate species and remains  
297 highly associated with sea ice year round (Griffiths 1983, Ainley et al. 1984, 1986, 1992,  
298 1993, Delord et al. 2016). We therefore used sea ice concentration (SIC) to describe the  
299 foraging habitat of snow petrels. Although sea surface temperature is commonly used to  
300 describe foraging habitats in seabirds, there are very few sea surface temperature observations  
301 in regions covered by sea ice, especially in the Southern Ocean (Rayner et al. 2003).  
302 Therefore this covariate could not be used. We used passive-microwave estimates of daily sea  
303 ice concentration from the Special Sensor Microwave Imager (SSM/I) brightness  
304 temperatures ( $12.5 \times 12.5$  km resolution) from the Institut Français de Recherche pour  
305 l'Exploitation de la Mer (Ifremer, [ftp://ftp.ifremer.fr/ifremer/cersat/products/gridded/psi-](ftp://ftp.ifremer.fr/ifremer/cersat/products/gridded/psi-concentration/data/antarctic)  
306 [concentration/data/antarctic](ftp://ftp.ifremer.fr/ifremer/cersat/products/gridded/psi-concentration/data/antarctic)). We also used bathymetry data (ocean depth at one-minute  
307 horizontal spatial resolution) obtained from NOAA's ETOPO  
308 (<https://sos.noaa.gov/datasets/etopo1-topography-and-bathymetry/>) as an additional habitat  
309 variable. Daily sea ice concentration and depth values were extracted for each foraging  
310 location (therefore excluding the commuting part of the trips at sea) on each track using  
311 bilinear interpolation from the native ice and depth grids using “*raster*” package in R  
312 (Hijmans 2018). Since snow petrels are highly associated with the sea ice region (as defined  
313 by the region within >15% sea ice concentration isocline, Cavalieri et al. 1991), the SIC data  
314 were filtered to retain SIC values >15%.

315

## 316 **2.6 Statistical analysis**

317 Isotopic niche of the two sexes was established using the metric SIBER (Stable Isotope  
318 Bayesian Ellipses), which is based on a Bayesian framework that confers a robust comparison  
319 to be made among data sets concerning different sample sizes (Jackson et al. 2011). The area  
320 of the standard ellipse ( $SEA_C$ , an ellipse having a 40% probability of containing a

321 subsequently sampled datum) was used to compare female and male isotopic values and their  
322 overlap in relation to the total niche width (i.e. both sexes combined), and a Bayesian estimate  
323 of the standard ellipse and its area ( $SEA_B$ ) was used to test whether females' isotopic niche is  
324 narrower than males' isotopic niche (Jackson et al. 2011). The *standard.ellipse* and  
325 *convexhull* functions were used to calculate these metrics from SIBER implemented in the  
326 package 'SIAR' (Parnell et al. 2010) under R.

327 Consistency in foraging niche was estimated following Votier et al. (2010) and Ceia et al.  
328 (2012), by regressing stable isotope ratios in plasma on those of blood cells to obtain an index  
329 of consistency in carbon source (habitat) and trophic level. Since  $\delta^{13}C$  has a trophic  
330 component, we used the studentized residuals of the relationship with  $\delta^{15}N$  in the same tissue  
331 (male plasma:  $F_{1,25}=1.438$ ,  $P=0.242$ ,  $r=0.233$ ; male blood cells:  $F_{1,36}=0.838$ ,  $P=0.366$ ,  
332  $r=0.151$ ; female plasma:  $F_{1,33}=1.470$ ,  $P=0.234$ ,  $r=0.206$ ; female blood cells:  $F_{1,45}=6.507$ ,  
333  $P=0.014$ ,  $r=0.355$ ) to determine the degree of short-term repeatability in  $\delta^{13}C$  independently  
334 of trophic effects. Longer-term foraging consistency was estimated by regressing stable  
335 isotope values of blood cells (actual breeding period) with those of feathers (most likely the  
336 end of the previous breeding period and subsequent fall at sea). We also used the residuals to  
337 correct the trophic component associate with  $\delta^{13}C$  by regressing these values upon  $\delta^{15}N$   
338 signatures in feathers (male:  $F_{1,36}=1.945$ ,  $P=0.172$ ,  $r=0.226$ ; female:  $F_{1,45}=5.863$ ,  $P=0.020$ ,  
339  $r=0.340$ ).

340 Foraging probability was modelled using a binomial generalized additive mixed model  
341 (GAMM) in the 'gamm4' package in R (Wood et al. 2017). This allowed for the possibility of  
342 nonlinear responses to environmental covariates, which we expected. The response variable  
343 was the tracking location, which was coded as 1 for a foraging location and as 0 for a  
344 commuting location, and explanatory variables were sea ice concentration and bathymetry.  
345 Because interactions between the variable sex and environmental covariates would be difficult

346 to interpret in complex nonlinear models, separate models were developed for male and  
347 female birds. Models included sea ice concentration and bathymetry as fixed factors, and bird  
348 identify as a random term to account for pseudoreplication issues. The smoothing parameter  
349 was chosen automatically using generalized cross-validation. To model spatial auto-  
350 correlation an isotropic thin plate spline was included, set up as a two dimensional smoother  
351 based on both x and y coordinates (Cleasby et al. 2015). To ascertain whether collinearity  
352 between covariates may have occurred we examined the correlations between environmental  
353 variables using a Spearman correlation coefficient since covariates were not normally  
354 distributed. We assumed that a correlation of greater than  $r_s$  0.4 was problematic, but the  
355 correlation was below this threshold ( $r_s = 0.14$ ).

356 Foraging intensity was modelled using GAM in the ‘*gam*’ package in R (Hastie &  
357 Tibshirani 1990). Foraging intensity was defined based on the frequency distribution of the  
358 tracking locations classified as foraging only. The environmental covariates were divided into  
359 K classes. Then, within each class the number of foraging locations was extracted and the  
360 count was used as the response variable. A GAM with a quasi-Poisson distribution was then  
361 fitted to the data. Separate models were developed for male and female birds. Models  
362 included sea ice concentration and bathymetry as fixed factors. The smoothing parameter was  
363 chosen automatically using generalized cross-validation. For SIC we used K=1% SIC classes  
364 and for bathymetry we used K=50 m classes.

365

### 366 **3 Results**

367 Male snow petrels were structurally larger than females, particularly for bill length and bill  
368 depth, and were 10% heavier than females (Table 1). Bill length, bill depth and body mass  
369 were the most sexually dimorphic phenotypic traits.

370

### 371 **3.1 Spatial distribution of males and females and habitat differences**

372 Males and females foraged in offshore waters to the east and to the west of the colony in  
373 equal proportions ( $\chi^2=0.03$ ,  $p=0.86$ , Figure 1). Space-use sharing was similar between males  
374 and females as the UDOI was not significantly lower than the null expectation for 25%, 50%,  
375 75% or 95% UDIs (Table 2). The 95% UDOI was  $> 1$ , indicating a higher than normal overlap  
376 between male and female UDIs relative to uniform space use, i.e. male and female UDIs were  
377 non-uniformly distributed and had a high degree of overlap. By contrast, the 25% UDOI was  
378 relatively close to 0 indicating less overlap between male and female UDIs relative to uniform  
379 space use. Males and females UDIs were also similar whatever the UDIs considered since BA  
380 were not significantly lower than the null expectation for 25%, 50%, 75% or 95% UDIs (Table  
381 2).

382 In average males foraged in areas with higher SIC than females (Table 3). Fitted models  
383 on foraging probability contained sex-specific smoothers for bathymetry and SIC (Table 4).  
384 For females, the GAMM model explained 10% of the deviance of foraging probability. All  
385 smoothers for SIC and bathymetry were significant (Table 4). Foraging probability increased  
386 sharply with increasing SIC up to 30% and more smoothly for high SIC (Figure 2). Foraging  
387 probability showed a first peak at depth of  $\approx 600$  m and a second and high peak at depth of  
388  $\approx 1600$  m. Foraging probability sharply increased at depths  $> 2500$  m but sample size was  
389 small and there was high uncertainty. Both the random intercept for bird identity and the  
390 spatial smoother were significant.

391 For males, the model explained 4.6% of the deviance of foraging probability. All  
392 smoothers for SIC and bathymetry, the random intercept for bird identity and the spatial  
393 smoother were significant (Table 4). Male foraging probability varied non-linearly with SIC  
394 and bathymetry. It increased smoothly with increasing SIC, and was higher when SIC was



395 higher than  $\approx 90\%$  (Figure 2). Foraging probability also increased with bathymetry up to  $\approx 600$   
396 m and remained relatively stable until  $\approx 2000$  m from which is increased.

397 Female foraging intensity was non-linearly related to SIC and bathymetry (Table 5).  
398 Foraging intensity increased with SIC up to a maximum for SIC  $\approx 40\%$  and then decreased for  
399 higher SIC (Figure 3). Lowest foraging intensity was observed for SIC  $> 80\%$ . Foraging  
400 intensity showed a rather bimodal distribution as a function of bathymetry. It was maximal in  
401 waters  $\approx 400$  m deep, then decreased to reach a minimum at  $\approx 1400$  m, and increased again for  
402 water depths between  $\approx 2000$ - $2700$  m. Male foraging intensity was non-linearly related to SIC  
403 and bathymetry (Table 5). It showed a bimodal distribution as a function of SIC, with a  
404 maximum for SIC  $\approx 36\%$  and a second peak for SIC  $\approx 85\%$  (Figure 3). As for females, male  
405 foraging intensity was bimodal as a function of bathymetry. It was maximal in waters  $\approx 400$  m  
406 deep, then decreased to reach a minimum at  $\approx 1500$  m, and increased up to a second peak in  
407 waters  $\approx 2400$  m deep.

408

### 409 **3.2 Stable isotope ratios**

410 Male plasma, blood cells and feathers had significantly 0.6-0.8‰ higher  $\delta^{15}\text{N}$  values than  
411 those of females (Table 6). There was no difference in  $\delta^{13}\text{C}$  values between males and  
412 females, except for plasma for which males had higher values. Males and females had similar  
413  $\text{SEA}_B$  for all tissues (Figure 4). Overlap between  $\text{SEA}_B$  areas for males and females was  
414 0.462, 0.586 and 0.599 for blood cells, plasma and feathers, respectively.

415 Strong significant positive relationships were found in  $\delta^{15}\text{N}$  between blood cells and  
416 plasma (males:  $F_{1,25}=18.846$ ,  $P<0.001$ ,  $r=0.656$ ; females:  $F_{1,33}=31.679$ ,  $P<0.001$ ,  $r=0.700$ ;  
417 Figure 5), but not between feathers and blood cells (males:  $F_{1,36}=0.036$ ,  $P=0.850$ ,  $r=0.032$ ;  
418 females:  $F_{1,45}=0.062$ ,  $P=0.805$ ,  $r=0.037$ ). No significant positive relationship was found in  
419 residual  $\delta^{13}\text{C}$  between blood cells, plasma and feathers (all  $p$ 's  $> 0.243$ ).

420 There was no significant relationship between isotopic values and body measurements or  
421 body condition (all  $p$ 's>0.08).

422

### 423 **3.3 Foraging trip performance and foraging efficiency**

424 Foraging trip duration, length, speed and directions (Table 7), as well as mass gain and  
425 proportion mass gain (Table 8) did not differ between males and females. Foraging efficiency,  
426 measured as the proportionate daily mass gain while foraging, was significantly greater for  
427 females than for males (Table 8), and was greater for larger females with deeper bills (PC1:  
428  $F_{1,20}=5.279$ ,  $P=0.033$ ,  $r=0.457$ ; bill depth:  $F_{1,20}=8.630$ ,  $P=0.008$ ,  $r=0.549$ ). In females, but not  
429 in males, foraging efficiency decreased with the duration of the foraging trip (Figure 6).

430 Females were more efficient than males during short (<2 days) foraging trips, but for trips  
431 longer than 2 days, foraging efficiency was similar in males and in females ( $t_{39}=0.862$ ,  $P =$   
432 0.394).

433

### 434 **3.4 Regulation of the foraging trips**

435 To investigate how birds regulate foraging trips according to the depletion of their body  
436 reserves, we correlated the body condition at departure with the duration of the foraging trips  
437 and the mass gain metrics while foraging. Foraging trip duration was not correlated to body  
438 condition at departure (all  $p$ 's>0.417), but mass gain and proportionate mass gain were  
439 negatively related to body condition at departure for both sexes (all  $p$ 's<0.005; Figure 6). In  
440 addition, in males, but not in females, daily mass gain and proportionate daily mass gain were  
441 negatively correlated to body condition at departure (males: all  $p$ 's<0.010; females: all  
442  $p$ 's>0.429).

443

### 444 **3.5 Factors affecting mass gain at sea**

445 For females, but not for males, mass gain, proportion mass gain and body condition at return  
446 from a foraging trip were positively correlated to mean and maximum sea ice concentration of  
447 the foraging trip locations (females: all  $p$ 's<0.049; males: all  $p$ 's>0.232; Figure 7). For males  
448 and females, there was no relationship between bathymetry and mass gain, proportion mass  
449 gain, and body condition at return (all  $p$ 's>0.100).

450

## 451 **4 Discussion**

452 This study provides clear evidence of sexual segregation and foraging tactics in snow petrels.  
453 In accordance with our prediction, we found evidence for sexual segregation in diet, with  
454 males feeding on average on higher trophic level prey when compared to females, but no  
455 evidence for spatial segregation as indicated by spatial data and  $\delta^{13}\text{C}$  isotopic data. Males and  
456 females differed in their usage of sea ice, providing evidence for sex-specific habitat  
457 segregation.

458

### 459 **4.1 Differences in habitat use**

460 During incubation males and females foraged predominantly in pack-ice areas over the deep  
461 Antarctic continental shelf and adjacent continental margin (500-900 m, due to the isostatic  
462 effect of the ice sheet), and to a lesser extent in oceanic waters. These results are consistent  
463 with previous observational work at sea showing that high densities of breeding snow petrels  
464 in the Ross Sea were found within the pack ice along the continental slope (Ainley et al.  
465 1984). The low tissue  $\delta^{13}\text{C}$  values of snow petrels is a consistent characteristic of consumers  
466 foraging in high-Antarctic waters (Cherel 2008, Cherel et al. 2011). Blood cell, plasma and  
467 feather  $\delta^{13}\text{C}$  values were similar in males and females, which indicates that both sexes foraged  
468 offshore in pelagic waters that present no obvious neritic-oceanic  $\delta^{13}\text{C}$  gradient in high-  
469 Antarctica (Cherel et al. 2011). Blood cell and plasma  $\delta^{13}\text{C}$  values of birds from Adélie Land

470 were similar to values obtained from snow petrel muscle tissue in the Weddell Sea (Rau et al.  
471 1992) between 64°S and 66°S, but were slightly lower than those measured in whole blood of  
472 birds from Hop Island (Hodum & Hobson 2000). However, the shape of the relationships  
473 between foraging intensity and SIC suggested that males and females used different sea ice  
474 habitats. Female foraging intensity was highest for SIC between  $\approx 20\%$  and  $\approx 40\%$ , and then  
475 decreased non-linearly for higher SIC, with a sharp decrease for SIC higher than  $\approx 70\%$ . By  
476 contrast male foraging intensity remained high for high SIC. Therefore, although foraging  
477 intensity decreased with increasing SIC for both sexes, males foraged more intensively in  
478 high sea ice concentration areas ( $> 70\%$ ) than females. Males and females made greater use of  
479 pack-ice areas over the continental shelf and continental margin than of oceanic pack-ice  
480 areas, but males were more likely to forage and foraged more intensively on the continental  
481 margin (-550 to -950 m) than females.

482 Few studies have simultaneously quantified between-sex differences in habitat use and  
483 foraging behavior in marine species in relation to dynamic oceanographic features such as sea  
484 ice. In the northern gannet (*Morus bassanus*), sexual segregation was driven largely by spatial  
485 and habitat segregation with males, smaller than females, mainly foraging in coastal mixed  
486 waters where net primary production was high, and females mainly foraging in offshore  
487 stratified waters (Cleasby et al. 2015). Similarly, the sex-specific habitat use reported in the  
488 monomorphic Barau's petrel (*Pterodroma barau*) during the prelaying exodus (males used  
489 more frequently marine areas with high productivity) can be partly explained by spatial  
490 segregation between sexes (Pinet et al. 2012). During the incubation and chick rearing period,  
491 they did not find evidence for habitat segregation and foraging areas largely overlapped. In  
492 the Adélie penguin (*Pygoscelis adeliae*) at Pointe Géologie, females foraged more intensively  
493 in areas of higher sea ice concentration than males during the guard stage, and there was  
494 spatial segregation between sexes with females foraging further from the colony than males

495 (Widmann et al. 2015). Using a multiyear comprehensive dataset, Paiva et al. (2017) found  
496 that sexual segregation in foraging areas and foraging habitats of Cory's shearwaters  
497 (*Calonectris borealis*) varied between years, with greater sexual (habitat and spatial)  
498 segregation during years when sea surface temperatures were higher and chlorophyll *a*  
499 concentrations were lower, presumably corresponding to lower food availability. In favorable  
500 years no spatial segregation was observed and habitat segregation was low. The hatching  
501 success of snow petrels during the 2015/2016 breeding season was 46.9%, i.e. lower than the  
502 long-term average of 63.3% (Chastel et al. 1993), suggesting that environmental conditions  
503 were relatively poor. However, we did not observed spatial segregation between sexes but  
504 foraging habitat use differed, with males foraging more frequently in high sea ice  
505 concentration areas than females. Such a pattern was found in the wandering albatross  
506 (*Diomedea exulans*) at South Georgia in which, despite no clear sexual segregation at large  
507 scales, sex-specific microhabitat selection was found during the chick-rearing period,  
508 resulting in sexual segregation in core foraging areas (Pereira et al. 2018). Multiple years of  
509 tracking are needed to shed light into the effects of environmental stochasticity (sea ice  
510 variability) on habitat segregation and spatial segregation.

511 As opposed to other highly sexually size-dimorphic seabirds (wandering albatross:  
512 Weimerskirch et al. 1993, giant petrels *Macronectes spp.*: Gonzales-Solis et al. 2000, boobies  
513 *Sula spp.*: Weimerskirch et al. 2009, frigatebirds *Fregata spp.*: Hennicke et al. 2015) snow  
514 petrels did not show spatial segregation in their foraging habitat during incubation. Spatial  
515 segregation in snow petrels may occur during other periods of the year such as during the  
516 chick-rearing period when which food requirements are particularly high for provisioning the  
517 chick. Alternatively, this lack of spatial segregation may be constrained by the specific  
518 foraging habitat requirements of snow petrels. These seabirds forage exclusively in a sea ice

519 environment, which is limited during the breeding season around breeding colonies and may  
520 thus constraint males and female to spatially overlap at a broad spatial scale.

521

#### 522 **4.2 Influence of sex on diet and foraging tactics**

523 The snow petrel diet is relatively well known during the chick-rearing period and isotopic  
524 data together with prey biometric data suggest that snow petrels mainly feed on postlarvae  
525 and juvenile Antarctic silverfish (*Pleuragramma antarcticum*) (Ridoux & Offredo 1989,  
526 Hodum & Hobson 2000, Pinkerton et al. 2013). Although, snow petrel diet during incubation  
527 remains poorly known,  $\delta^{15}\text{N}$  values obtained in our study are similar or slightly higher than  
528 those found in other studies during the chick rearing period (Hodum & Hobson 2000, Delord  
529 et al. 2016), suggesting a similar diet. Nevertheless, and despite large overlap in their core  
530 isotopic niches as indicated by the standard ellipse areas, female snow petrels had lower  $\delta^{15}\text{N}$   
531 values than males for all tissues sampled, which suggests they were feeding on lower trophic  
532 level prey than males. Similar results were found by Tartu et al. (2014) for blood cells during  
533 the pre-laying period. We speculate that there might be at least two reasons for this. First,  
534 compared to males, females may feed more frequently on other prey than Antarctic silverfish,  
535 such as crustaceans with are situated at a lower trophic level than Antarctic silverfish. Indeed,  
536 diet studies indicate that snow petrels also feed on crustaceans such as *Euphausia superba*, *E.*  
537 *crystallorophias*, *Themisto gaudichaudii*, and other amphipods (Ainley et al. 1984, Ridoux &  
538 Offredo 1989) which have lower  $\delta^{15}\text{N}$  values than Antarctic silverfish (Pinkerton et al. 2013).  
539 Second, females may feed on Antarctic silverfish in similar proportions than males but on  
540 smaller sized individuals (i.e. younger). It is known that  $\delta^{15}\text{N}$  values increase with body  
541 length (and age) in Antarctic silverfish from  $\approx 7\text{-}8\text{‰}$  in larvae (10-20 mm standard length) to  
542  $\approx 10\text{-}11\text{‰}$  in juvenile and adult fish (Giraldo et al. 2011, Pinkerton et al. 2013). It is currently  
543 unknown whether sea ice concentration and characteristics differentially affect the spatial

544 distribution of Antarctic silverfish age-classes. However, it is likely that females fed more on  
545 crustaceans than on young silverfish since crustaceans have much lower  $\delta^{15}\text{N}$  values than  
546 young silverfish (Cherel 2008). Thus, our results suggest that males ate more silverfish in  
547 areas with higher sea ice concentration.

548 The strong positive relationship between plasma  $\delta^{15}\text{N}$  and blood  $\delta^{15}\text{N}$  indicates short term  
549 (over weeks) consistency in trophic level between successive foraging trips during incubation.  
550 Values of  $\delta^{15}\text{N}$  in plasma and feathers did not differ in both sexes (Appendix 1), but blood  
551  $\delta^{15}\text{N}$  were smaller than feather and plasma  $\delta^{15}\text{N}$  in both sexes, suggesting that males and  
552 females fed on lower trophic level prey prior to incubation than during the breeding season.  
553 Short and long term consistency in foraging water masses was also low as indicated by the  
554 lack of relationship between plasma and blood  $\delta^{13}\text{C}$ , and between feather and blood  $\delta^{13}\text{C}$ ,  
555 respectively. Indeed tracking data indicated that birds foraged on the continental shelf,  
556 continental margin, and to a lesser extent in oceanic waters. Values of  $\delta^{13}\text{C}$  in feathers were  
557 higher than those in blood and plasma for both sexes (Appendix 1), suggesting that during the  
558 latter part of the breeding season and the beginning of the non-breeding season snow petrels  
559 foraged in more oceanic waters (snow petrels start molting during the chick rearing period  
560 and until early May (Beck 1969, 1970, Delord et al. 2016). This period coincides with the sea  
561 ice growth and its northward extension.

562 The negative relationship between mass gain (and proportion daily mass gain) during a  
563 foraging trip and body condition at departure for a foraging trip (i.e. at the end of fasting  
564 while incubating the egg), indicated that males and females were able to regulate their body  
565 reserves as found in other Procellariiformes species (Chaurand & Weimerskirch 1994,  
566 Gonzales-Solis et al. 2000). Although both sexes regulated body condition, this ability seemed  
567 greater for females than for males. Indeed, body condition at departure for a foraging trip was  
568 lower in females than in males, but similar for both sexes at return from a foraging trip despite

569 similar trip durations. This is further supported by the fact that females had higher daily mass  
570 gains and proportion daily mass gains than males. However, this greater ability in females  
571 may be partly explained by the fact that females undertook short foraging trips during which  
572 mass gain was particularly high (Figure 1). Although some males also made short foraging  
573 trips, mass gain was still lower than female mass gain during these trips. In fact, when  
574 considering foraging trips longer than 2 days, daily mass gain and proportion daily mass gain  
575 were similar for males and females (daily mass gain:  $t_{39}=0.397$ ,  $P = 0.693$ ; proportion daily  
576 mass gain:  $t_{39}=0.862$ ,  $P = 0.394$ ). Therefore, these results suggest that female foraging  
577 efficiency was similar in males and females, except during short (<2 days) foraging trips  
578 during which females appeared more efficient. We suspect that some females undertook short  
579 foraging trips during their incubation shift in order to restore their body condition to avoid  
580 abandoning the egg while their partner was foraging at sea. This could result from the lower  
581 fasting capacities of females compared to males due to their smaller body size (Barbraud &  
582 Chastel 1999).

583 Interestingly, the ability of females (but not of males) to restore their body condition  
584 during a foraging trip was affected by sea ice concentration. Indeed, female body condition at  
585 return from a foraging trip was positively related to sea ice concentration in the foraging area,  
586 contrary to males. This suggests that areas with heavy sea ice concentration were more  
587 profitable. This is further supported by the positive relationship between male (but not  
588 female) body condition at return from a foraging trip and time spent at sea (Pearson  
589 correlation coefficient:  $p = 0.05$ ), and given that males foraged more frequently in high sea ice  
590 concentration areas. Thus, foraging on highly nutritional preys such as silverfish in high sea  
591 ice concentration areas might be more efficient to restore body condition than feeding in more  
592 open water areas.



593       Body condition at the start of a foraging trip was not related to the time spent at sea  
594 (Pearson correlation coefficient:  $p = 0.417$  for females,  $p = 0.576$  for males), suggesting that  
595 the time spent at sea was not only dependent on the restoration of body condition. Although  
596 only a few birds returned to undertake the next incubation shift after losing mass ( $n = 3$ ,  
597 6.3%) or without gaining mass ( $n = 3$ , 6.3%), this suggests that mass gain alone does not  
598 explain the decision to return to the colony. Perhaps birds took into account the increased  
599 probability of partners deserting the egg with the increasing duration of the foraging trip  
600 (Tveraa et al. 1997).

601       Thus, incubating female snow petrels seemed more efficient at restoring their body  
602 condition during a foraging trip despite similar trip duration, length or speed, while foraging  
603 areas were identical to those of males at a broad spatial scale. However, this higher efficiency  
604 mainly concerned short (<2 days) foraging trips. In addition, our results show that females  
605 foraging in high sea ice concentration areas foraged more efficiently (this relationship holds  
606 when excluding foraging trip <2 days), and female fed on lower trophic level preys than  
607 males. Together, these results suggest that areas with high sea ice concentration may be more  
608 profitable for resource acquisition, perhaps due to higher abundance, availability or quality of  
609 prey such as the Antarctic silverfish.

610

### 611 **4.3 Factors underlying sexual segregation**

612 Sex differences in foraging behavior could result from the influence of sexual size  
613 dimorphism on foraging efficiency and intra-specific competition (forage-selection hypothesis  
614 and scrambled competition hypothesis). The positive relationship between female bill depth  
615 and proportion daily mass gain suggests that foraging efficiency is size dependent in females,  
616 which are smaller than males. Our results also suggest that the most favorable areas were  
617 areas of high sea ice concentration (females body condition at return increased with increase

618 sea ice concentration, male body condition at return increased with foraging trip length),  
619 which were used less frequently by females. Therefore, it is possible that females were  
620 excluded from high sea ice concentration areas via direct competition. This could possibly  
621 indicate that male and female snow petrels try to avoid competition and thus diverged in  
622 habitat preference in more profitable areas, where intra-specific competition might be more  
623 intense. Such a mechanism was also proposed to explain sex-specific differences in broad  
624 scale foraging areas in highly sexually size dimorphic species (wandering albatross:  
625 Weimerskirch et al. 1993, Shaffer et al. 2001; giant petrels: Gonzales-Solis et al. 2000), but  
626 also in foraging habitat at a microhabitat scale (Pereira et al. 2018). A major assumption of  
627 the intersexual competition hypothesis is that prey capture should be a function of bill size  
628 (Selander 1966, Shine 1989). Although we do not have the data in hand to test this prediction  
629 explicitly, we note that  $\delta^{15}\text{N}$  values suggested that females consumed lower sized prey than  
630 males (crustaceans vs fish). Females with thicker bills were also more efficient during their  
631 foraging trip, suggesting they were feeding on more profitable prey, and bill size was among  
632 the most sexually dimorphic phenotypic trait in this species.

633 Sex-specific niche divergence and habitat segregation can also arise from a difference  
634 between sexes in parental roles and investment (the activity budget hypothesis, Clarke et al.  
635 1998, Thaxter et al. 2009, Weimerskirch et al. 2009, Pinet et al. 2012). Although males  
636 undertake a greater investment in chick provisioning through higher feeding frequencies  
637 (Barbraud et al. 1999), there is little differentiation in the reproductive role of male and  
638 female snow petrels during incubation. Males make slightly shorter foraging trips than  
639 females during incubation (Isenmann 1970, Barbraud et al. 1999), but in average the total  
640 time spent foraging during the incubation period is very similar for both sexes (males: average  
641 19.8 days, females: average 21.0 days, Barbraud 1999), indicating that the roles of male and  
642 female snow petrels do not appear to differ substantially during incubation. Therefore, it

643 seems unlikely that such limited constraints related to reproductive role specialization could  
644 explain why female snow petrels foraged less intensively in high sea ice concentration areas;  
645 this hypothesis can probably, therefore, be discounted. Sex-specificity in flight performance  
646 may also be responsible for sexual segregation (Shaffer et al. 2001, Phillips et al. 2004).  
647 Indeed, sexual dimorphism in wing area and wing loading in several albatross species may  
648 partially explain large-scale sexual segregation in foraging areas in these species: sex-specific  
649 foraging locations were likely influenced by activity budgets since smaller birds are more  
650 efficient flyers. Therefore, other aspects of the morphology not measured here, such as wing  
651 loading and agility, may be important. Female snow petrels appear to have a lower aspect  
652 ratio and lower wing loading than males (Spear & Ainley 1998), suggesting they might be  
653 less flight efficient but more maneuverable than males. However, since there was no spatial  
654 segregation between sexes at large-spatial scales, environmental conditions potentially  
655 affecting flight efficiency (wind speed) were identical for males and females. Thus, these  
656 aspects are also unlikely to be of importance in snow petrels to explain sex-specific foraging  
657 habitat use during incubation.

658 Overall, our study demonstrates sex-specific foraging tactics in a highly sexually size  
659 dimorphic species during the incubation period, probably driven by intra-specific competition.  
660 Results indicate an absence of sexual segregation at a broad-spatial scale, but suggest that  
661 sexual segregation in snow petrels is mediated by habitat segregation at a microhabitat scale.  
662 Males foraged more intensively than females in high sea ice concentration areas, which  
663 seemed to be more profitable in terms of resource acquisition as results suggest that males ate  
664 more fish in these areas. Studying sex-specific foraging tactics during the entire breeding  
665 period, thus including the pre-laying exodus and the chick-rearing period, is however  
666 necessary to better understand the underlying drivers of sexual segregation in snow petrels  
667 and in marine predators in general (Pinet et al. 2012). Sexual segregation in foraging behavior

668 may also vary between years as a function of environmental conditions (Cleasby et al. 2015,  
669 Paiva et al. 2017), highlighting the need for multi-year tracking studies.

670

## 671 **5 Acknowledgments**

672 The authors thank G. Brodin for his help in designing GPS loggers and extracting some GPS  
673 data, J. Vasseur who helped with deploying and recovering some GPS loggers and collecting  
674 tissue samples. The authors are grateful to the analytical Plateformes of the LIENSs  
675 laboratory for the access to their analytical facilities, and in particular to M. Brault-Favrou  
676 and G. Guillou for running stable isotope analyses. The work was supported financially and  
677 logistically by the French Polar Institute (IPEV program No. 109, PI H. Weimerskirch), the  
678 French Southern Territories administration (TAAF). The field study was approved by the  
679 IPEV ethics committee and Comité de l'Environnement Polaire. The IUF (Institut  
680 Universitaire de France) is acknowledged for its support to PB as a Senior Member.

681

## 682 **References**

- 683 Ainley D, Fraser W, Smith W, Hopkins T, Torres J (1991) The structure of upper level  
684 pelagic food webs in the Antarctic: effect of phytoplankton distribution. *J Marine*  
685 *Systems* 2:111–122
- 686 Ainley D, Fraser W, Sullivan C, Torres J, Hopkins T, Smith W (1986) Antarctic mesopelagic  
687 micronekton : evidence from seabirds that pack ice affects community structure.  
688 *Science* 232:847–849
- 689 Ainley DG, O'Connor EF, Boekelheide RJ (1984) The marine ecology of birds in the Ross  
690 Sea, Antarctica. *Ornithological Monographs* 32:1–97
- 691 Ainley DG, Ribic CA, Fraser WR (1992) Does prey preference affect habitat choice in  
692 Antarctic seabirds ? *Mar Ecol Prog Ser* 90:207–221
- 693 Ainley DG, Ribic CA, Spear LB (1993) Species-habitat relationships among antarctic  
694 seabirds: a function of physical or biological factors ? *The Condor* 95:806–816
- 695 Baduini CL, Hyrenbach KD (2003) Biogeography of procellariiform foraging strategies: does  
696 ocean productivity influence provisioning. *Mar Ornithol* 31:101–112

- 697 Barboza PS, Bowyer RT (2000) Sexual segregation in dimorphic deer: a new gastrocentric  
698 hypothesis. *Journal of Mammalogy* 81:473–489
- 699 Barbraud C (1999a) Subspecies-selective predation of snow petrels by skuas. *Oikos*:275–282
- 700 Barbraud C (1999b) Aspects écologiques et évolutifs de la variation de la taille corporelle  
701 chez le pétrel des neiges, *Pagodroma nivea*. Unpublished PhD Thesis, Université de  
702 Tours, France.
- 703 Barbraud C, Chastel O (1999) Early body condition and hatching success in the snow petrel  
704 *Pagodroma nivea*. *Polar Biol* 21:1–4
- 705 Barbraud C, Mariani A, Jouventin P (2000) Variation in call properties of the snow petrel,  
706 *Pagodroma nivea*, in relation to sex and body size. *Australian Journal of Zoology*  
707 48:421–430
- 708 Barbraud C, Weimerskirch H, Robertson GG, Jouventin P (1999) Size-related life history  
709 traits: insights from a study of snow petrels (*Pagodroma nivea*). *Journal of Animal*  
710 *Ecology* 68:1179–1192
- 711 Baylis A, Orben R, Costa D, Arnould J, Staniland I (2016) Sexual segregation in habitat use is  
712 smaller than expected in a highly dimorphic marine predator, the southern sea lion.  
713 *Marine Ecology Progress Series* 554:201–211
- 714 Bearhop S, Waldron S, Votier SC, Furness RW (2002) Factors that influence assimilation  
715 rates and fractionation of nitrogen and carbon stable isotopes in avian blood and  
716 feathers. *Physiological and Biochemical Zoology* 75:451–458
- 717 Beck J (1969) Breeding seasons and moult in some smaller Antarctic petrels. In: *Antarctic*  
718 *Ecology*, London.p 542–550
- 719 Beck J (1970) Breeding seasons and moult in some smaller Antarctic petrels. *Antarctic*  
720 *ecology* 1:542–550
- 721 Beier P (1987) Sex differences in quality of white-tailed deer diets. *Journal of Mammalogy*  
722 68:323–329
- 723 Breed GA, Bowen W, McMillan J, Leonard ML (2006) Sexual segregation of seasonal  
724 foraging habitats in a non-migratory marine mammal. *Proceedings of the Royal*  
725 *Society of London B: Biological Sciences* 273:2319–2326
- 726 Brown D (1966) Breeding biology of the Snow petrel *Pagodroma nivea* (Forster). *Anare*  
727 *Scientific Reports* 89:1–63
- 728 Calenge C, Dray S, Royer-Carenzi M (2009) The concept of animals' trajectories from a data  
729 analysis perspective. 4:34–41
- 730 Carravieri A, Cherel Y, Blévin P, Brault-Favrou M, Chastel O, Bustamante P (2014) Mercury  
731 exposure in a large subantarctic avian community. *Environmental Pollution* 190:51–57
- 732 Cavalieri D, Crawford J, Drinkwater M, Eppler D, Farmer L, Jentz R, Wackerman C (1991)  
733 Aircraft active and passive microwave validation of sea ice concentration from the

- 734 Defense Meteorological Satellite Program Special Sensor Microwave Imager. *Journal*  
735 *of Geophysical Research: Oceans* 96:21989–22008
- 736 Ceia FR, Phillips RA, Ramos JA, Cherel Y, Vieira RP, Richard P, Xavier JC (2012) Short-  
737 and long-term consistency in the foraging niche of wandering albatrosses. *Marine*  
738 *biology* 159:1581–1591
- 739 Chastel O, Weimerskirch H, Jouventin P (1993) High annual variability in reproductive  
740 success and survival of an antarctic seabird, the snow petrel *Pagodroma nivea*.  
741 *Oecologia* 94:278–285
- 742 Chaurand T, Weimerskirch H (1994) Incubation routine, body mass regulation and egg  
743 neglect in the blue petrel *Halobaena caerulea*. *Ibis* 136:285–290
- 744 Cherel Y (2008) Isotopic niches of emperor and Adélie penguins in Adélie Land, Antarctica.  
745 *Marine Biology* 154:813–821
- 746 Cherel Y, Fontaine C, Richard P, Labat JP (2010) Isotopic niches and trophic levels of  
747 myctophid fishes and their predators in the Southern Ocean. *Limnology and*  
748 *Oceanography* 55:324–332
- 749 Cherel Y, Hobson KA (2007) Geographical variation in carbon stable isotope signatures of  
750 marine predators: a tool to investigate their foraging areas in the Southern Ocean. *Mar*  
751 *Ecol Prog Ser* 329:281–287
- 752 Cherel Y, Hobson KA, Bailleul F, Groscolas R (2005) Nutrition, physiology, and stable  
753 isotopes: new information from fasting and molting penguins. *Ecology* 86:2881–2888
- 754 Cherel Y, Hobson K, Weimerskirch H (2005) Using stable isotopes to study resource  
755 acquisition and allocation in procellariiform seabirds. *Oecologia* 145:533–540
- 756 Cherel Y, Koubbi P, Giraldo C, Penot F, Tavernier E, Moteki M, Ozouf-Costaz C, Causse R,  
757 Chartier A, Hosie G (2011) Isotopic niches of fishes in coastal, neritic and oceanic  
758 waters off Adélie Land, Antarctica. *Polar science* 5:286–297
- 759 Clarke J, Manly B, Kerry KR, Gardner H, Franchi E, Corsolini S, Focardi S (1998) Sex  
760 differences in Adélie penguin foraging strategies. *Polar biology* 20:248–258
- 761 Cleasby IR, Wakefield ED, Bodey TW, Davies RD, Patrick SC, Newton J, Votier SC,  
762 Bearhop S, Hamer KC (2015) Sexual segregation in a wide-ranging marine predator is  
763 a consequence of habitat selection. *Mar Ecol Prog Ser* 518:1–12
- 764 Clutton-Brock T, Iason G, Guinness F (1987) Sexual segregation and density-related changes  
765 in habitat use in male and female Red deer (*Cervus elaphus*). *Journal of Zoology*  
766 211:275–289
- 767 Conradt L (1998) Could asynchrony in activity between the sexes cause intersexual social  
768 segregation in ruminants? *Proceedings of the Royal Society of London B: Biological*  
769 *Sciences* 265:1359–1368
- 770 Conradt L (2005) Definitions, hypotheses, models and measures in the study of animal  
771 segregation. *Sexual segregation in vertebrates: ecology of the two sexes* (KE

- 772 Ruckstuhl and P Neuhaus, eds) Cambridge University Press, Cambridge, United  
773 Kingdom:11–34
- 774 Croxall J (1982) Sexual dimorphism in Snow petrels *Pagodroma nivea*. *Notornis* 29:171–180
- 775 Croxall JP, Steele WK, McInnes SJ, Prince PA (1995) Breeding distribution of the snow  
776 petrel *Pagodroma nivea*. *Marine Ornithology* 23:69–99
- 777 Delord K, Pinet P, Pinaud D, Barbraud C, Grissac S de, Lewden A, Cherel Y, Weimerskirch  
778 H (2016) Species-specific foraging strategies and segregation mechanisms of  
779 sympatric Antarctic fulmarine petrels throughout the annual cycle. *Ibis* 158:569–586
- 780 Elliott KH, Gaston AJ, Crump D (2010) Sex-specific behavior by a monomorphic seabird  
781 represents risk partitioning. *Behavioral Ecology* 21:1024–1032
- 782 Fairbairn J, Shine R (1993) Patterns of sexual size dimorphism in seabirds of the southern  
783 hemisphere. *Oikos* 68:139–145
- 784 Ferretti V, Soave GE, Casaux R, Coria NR (2001) Diet of the Snow Petrel *Pagodroma nivea*  
785 at Laurie Island, Antarctica, during the 1997/98 breeding season. *Marine Ornithology*  
786 29:71–73
- 787 Fieberg J, Kochanny CO (2005) Quantifying home-range overlap: the importance of the  
788 utilization distribution. *Journal of wildlife management* 69:1346–1359
- 789 Giraldo C, Cherel Y, Vallet C, Mayzaud P, Tavernier E, Moteki M, Hosie G, Koubbi P (2011)  
790 Ontogenic changes in the feeding ecology of the early life stages of the Antarctic  
791 silverfish (*Pleuragramma antarcticum*) documented by stable isotopes and diet  
792 analysis in the Dumont d’Urville Sea (East Antarctica). *Polar Science* 5:252–263
- 793 Gonzales-Solis J, Croxall J, Wood A (2000) Sexual dimorphism and sexual segregation in  
794 foraging strategies of northern giant petrels *Macronectes halli* during incubation.  
795 *Oikos* 90:390–398
- 796 Griffiths A (1983) Factors affecting the distribution of the Snow Petrel (*Pagodroma nivea*)  
797 and the Antarctic Petrel (*Thalassoica antarctica*). *Ardea* 71:145–150
- 798 Gross JE (1998) Sexual segregation in ungulates: a comment. *Journal of Mammalogy*  
799 79:1404–1409
- 800 Guillotin M, Jouventin P (1980) Le Pétrel des Neiges à Pointe Géologie. *Gerfaut* 70:51–72
- 801 Harder LD, Barrett SC, Cole WW (2000) The mating consequences of sexual segregation  
802 within inflorescences of flowering plants. *Proceedings of the Royal Society of London*  
803 B: Biological Sciences 267:315–320
- 804 Harper PC, Croxall JP, Cooper J (1985) A guide to foraging methods used by marine birds in  
805 antarctic and subantarctic seas. *Biomass Handbook* 24:1–22
- 806 Hastie TJ, Tibshirani RJ (1990) Generalized additive models, volume 43 of Monographs on  
807 Statistics and Applied Probability.

- 808 Hennieke JC, James DJ, Weimerskirch H (2015) Sex-specific habitat utilization and  
809 differential breeding investments in Christmas Island frigatebirds throughout the  
810 breeding cycle. *PLoS one* 10:e0129437
- 811 Hijmans R (2018) raster: Geographic Data Analysis and Modeling. R package version 2.6-7.
- 812 Hobson KA, Clark RG (1992) Assessing avian diets using stable isotopes I: turnover of  $^{13}\text{C}$  in  
813 tissues. *The Condor* 94:181–188
- 814 Hobson KA, Clark RG (1993) Turnover of  $^{13}\text{C}$  in cellular and plasma fractions of blood:  
815 implications for non destructive sampling in avian dietary studies. *The Auk* 110:638–  
816 641
- 817 Hochkirch A, Gröning J, Krause S (2007) Intersexual niche segregation in Cepero’s Ground-  
818 hopper, *Tetrix ceperoi*. *Evolutionary Ecology* 21:727–738
- 819 Hodum PJ, Hobson KA (2000) Trophic relationships among Antarctic fulmarine petrels:  
820 insights into dietary overlap and chick provisioning strategies inferred from stable-  
821 isotope ( $\delta\text{N-15}$  and  $\delta\text{C-13}$ ) analyses. *Mar Ecol Prog Ser* 198:273–281
- 822 Isenmann P (1970) Contribution à la biologie de reproduction du pétrel des neiges  
823 (*Pagodroma nivea* Forster). Le problème de la petite et de la grande forme.
- 824 Jackson AL, Inger R, Parnell AC, Bearhop S (2011) Comparing isotopic niche widths among  
825 and within communities: SIBER—Stable Isotope Bayesian Ellipses in R. *Journal of*  
826 *Animal Ecology* 80:595–602
- 827 Jaeger A, Connan M, Richard P, Cherel Y (2010) Use of stable isotopes to quantify seasonal  
828 changes of trophic niche and levels of population and individual specialisation in  
829 seabirds. *Mar Ecol Prog Ser* 401:269–277
- 830 Kernaléguen L, Arnould J, Guinet C, Cazelles B, Richard P, Cherel Y (2016) Early-life sexual  
831 segregation: ontogeny of isotopic niche differentiation in the Antarctic fur seal.  
832 *Scientific reports* 6:33211
- 833 Lewis S, Benvenuti S, Dall–Antonia L, Griffiths R, Money L, Sherratt T, Wanless S, Hamer  
834 K (2002) Sex-specific foraging behaviour in a monomorphic seabird. *Proceedings of*  
835 *the Royal Society of London B: Biological Sciences* 269:1687–1693
- 836 Maher WJ (1962) Breeding biology of the snow petrel near Cape Hallett, Antarctica. *The*  
837 *Condor* 64:488–499
- 838 Main MB, Weckerly FW, Bleich VC (1996) Sexual segregation in ungulates: new directions  
839 for research. *Journal of Mammalogy* 77:449–461
- 840 Mancini P, Bond A, Hobson K, Duarte L, Bugoni L (2013) Does sexual size dimorphism  
841 facilitate trophic segregation? Testing the intersexual competition hypothesis with  
842 tropical and polar seabirds. *Journal of Experimental Marine Biology and Ecology*  
843 449:186–193



- 844 Martin A, Da Silva V (2004) River dolphins and flooded forest: seasonal habitat use and  
845 sexual segregation of botos (*Inia geoffrensis*) in an extreme cetacean environment.  
846 *Journal of zoology* 263:295–305
- 847 Mougín J (1968) Etude écologique de quatre espèces de pétrels antarctiques. *L'Oiseau et R F*  
848 *O* 38:1–52
- 849 Neuhaus P, Ruckstuhl KE (2004) A Critique: Can the Activity Budget Hypothesis Explain  
850 Sexual Segregation in Desert Bighorn Sheep? *Behaviour*:513–520
- 851 Paiva VH, Pereira J, Ceia FR, Ramos JA (2017) Environmentally driven sexual segregation in  
852 a marine top predator. *Scientific reports* 7:2590
- 853 Parnell AC, Inger R, Bearhop S, Jackson AL (2010) Source partitioning using stable isotopes:  
854 coping with too much variation. *PloS one* 5:e9672
- 855 Peig J, Green AJ (2009) New perspectives for estimating body condition from mass/length  
856 data: the scaled mass index as an alternative method. *Oikos* 118:1883–1891
- 857 Peig J, Green AJ (2010) The paradigm of body condition: a critical reappraisal of current  
858 methods based on mass and length: The paradigm of body condition. *Functional*  
859 *Ecology* 24:1323–1332
- 860 Pereira JM, Paiva VH, Phillips RA, Xavier JC (2018) The devil is in the detail: small-scale  
861 sexual segregation despite large-scale spatial overlap in the wandering albatross.  
862 *Marine Biology* 165:55
- 863 Phillips RA, McGill RAR, Dawson DA, Bearhop S (2011) Sexual segregation in distribution,  
864 diet and trophic level of seabirds: insights from stable isotope analysis. *Marine*  
865 *Biology* 158:2199–2208
- 866 Phillips RA, Silk JRD, Phalan B, Catry P, Croxall JP (2004) Seasonal sexual segregation in  
867 two *Thalassarche* albatross species: competitive exclusion, reproductive role  
868 specialization or foraging niche divergence? *Proceedings of the Royal Society of*  
869 *London Series B: Biological Sciences* 271:1283–1291
- 870 Phillips RA, Wakefield ED, Croxall JP, Fukuda A, Higuchi H (2009) Albatross foraging  
871 behaviour: no evidence for dual foraging, and limited support for anticipatory  
872 regulation of provisioning at South Georgia. *Marine Ecology Progress Series*  
873 391:279–292
- 874 Phillips RA, Xavier JC, Croxall JP, Burger AE (2003) Effects of satellite transmitters on  
875 albatrosses and petrels. *The Auk* 120:1082–1090
- 876 Pinet P, Jaquemet S, Phillips RA, Le Corre M (2012) Sex-specific foraging strategies  
877 throughout the breeding season in a tropical, sexually monomorphic small petrel.  
878 *Animal Behaviour* 83:979–989
- 879 Pinkerton M, Forman J, Bury S, Brown J, Horn P, O'Driscoll R (2013) Diet and trophic niche  
880 of Antarctic silverfish *Pleuragramma antarcticum* in the Ross Sea, Antarctica. *Journal*  
881 *of fish biology* 82:141–164

- 882 R Development Core Team 2015. R: A language and environment for statistical computing.  
883 Vienna: R Foundation for statistical computing, <https://www.R-project.org>
- 884 Rau GH, Ainley DG, Bengtson JL, Torres JJ, Hopkins TL (1992) 15 N/14 N and 13 C/12 C in  
885 Weddell Sea birds, seals, and fish: implications for diet and trophic structure. *Marine*  
886 *Ecology Progress Series*:1–8
- 887 Rayner N, Parker DE, Horton E, Folland C, Alexander L, Rowell D, Kent E, Kaplan A (2003)  
888 Global analyses of sea surface temperature, sea ice, and night marine air temperature  
889 since the late nineteenth century. *Journal of Geophysical Research: Atmospheres* 108
- 890 Ridoux V, Offredo C (1989) The diets of five summer breeding seabirds in Adélie Land,  
891 Antarctica. *Polar biology* 9:137–145
- 892 Romey WL, Wallace AC (2007) Sex and the selfish herd: sexual segregation within  
893 nonmating whirling groups. *Behavioral Ecology* 18:910–915
- 894 Ruckstuhl K (2007) Sexual segregation in vertebrates: proximate and ultimate causes.  
895 *Integrative and Comparative Biology* 47:245–257
- 896 Ruckstuhl K, Neuhaus P (2005) Sexual segregation in vertebrates: ecology of the two sexes.  
897 1st edn. Cambridge: Cambridge University Press
- 898 Selander RK (1966) Sexual dimorphism and differential niche utilization in birds. *The Condor*  
899 68:113–151
- 900 Shaffer SA, Costa D, Weimerskirch H (2001) Behavioural factors affecting foraging effort of  
901 breeding wandering albatrosses. *Journal of animal ecology* 70:864–874
- 902 Shine R (1989) Ecological causes for the evolution of sexual dimorphism: a review of the  
903 evidence. *The Quarterly Review of Biology* 64:419–461
- 904 Sims DW (2005) Differences in habitat selection and reproductive strategies of male and  
905 female sharks. *Sexual segregation in vertebrates: Ecology of the two sexes* 8:127–147
- 906 Spear LB, Ainley DG (1998) Morphological differences relative to ecological segregation in  
907 petrels (Family: Procellariidae) of the Southern Ocean and tropical Pacific. *The*  
908 *Auk*:1017–1033
- 909 Tartu S, Bustamante P, Goutte A, Cherel Y, Weimerskirch H, Bustnes JO, Chastel O (2014)  
910 Age-Related Mercury Contamination and Relationship with Luteinizing Hormone in a  
911 Long-Lived Antarctic Bird. *Plos One* 9
- 912 Thaxter CB, Daunt F, Hamer KC, Watanuki Y, Harris MP, Grémillet D, Peters G, Wanless S  
913 (2009) Sex-specific food provisioning in a monomorphic seabird, the common  
914 guillemot *Uria aalge*: nest defence, foraging efficiency or parental effort? *Journal of*  
915 *Avian Biology* 40:75–84
- 916 Tveraa T, Lorensten S-H, Sæther B-E (1997) Regulation of foraging trips and costs of  
917 incubation shifts in the Antarctic petrel (*Thalassoica antarctica*). *Behavioral Ecology*  
918 8:465–469

- 919 Van Franeker J, Williams R (1992) Diet of fulmarine petrels in the Windmill Islands, Wilkes  
920 Land, Antarctica. Preliminary results.
- 921 Votier SC, Bearhop S, Witt MJ, Inger R, Thompson DR, Newton J (2010) Individual  
922 responses of seabirds to commercial fisheries revealed using GPS tracking, stable  
923 isotopes and vessel monitoring systems. *Journal of applied ecology* 47:487–497
- 924 Wakefield ED, Phillips RA, Matthiopoulos J, Fukuda A, Higuchi H, Marshall GJ, Trathan PN  
925 (2009) Wind field and sex constrain the flight speeds of central-place foraging  
926 albatrosses. *Ecological Monographs* 79:663–679
- 927 Wearmouth VJ, Sims DW (2008) Sexual segregation in marine fish, reptiles, birds and  
928 mammals: behaviour patterns, mechanisms and conservation implications. *Advances*  
929 *in marine biology* 54:107–170
- 930 Weimerskirch H (2007) Are seabirds foraging for unpredictable resources? *Deep Sea*  
931 *Research Part II: Topical Studies in Oceanography* 54:211–223
- 932 Weimerskirch H, Lallemand J, Martin J (2005) Population sex ratio variation in a  
933 monogamous long-lived bird, the wandering albatross. *Journal of Animal Ecology*  
934 74:285–291
- 935 Weimerskirch H, Mougey T, Hindermayer X (1997) Foraging and provisioning strategies of  
936 black-browed albatrosses in relation to the requirements of the chick: natural variation  
937 and experimental study. *Behavioral ecology* 8:635–643
- 938 Weimerskirch H, Salamolard M, Sarrazin F, Jouventin P (1993) Foraging strategy of  
939 wandering albatrosses through the breeding season: a study using satellite telemetry.  
940 *The Auk* 110:325–342
- 941 Weimerskirch H, Shaffer SA, Tremblay Y, Costa DP, Gadenne H, Kato A, Ropert-Coudert Y,  
942 Sato K, Aurioules D (2009) Species- and sex-specific differences in foraging behaviour  
943 and foraging zones in blue-footed and brown boobies in the Gulf of California. *Marine*  
944 *Ecology Progress Series* 391:267–278
- 945 Widmann M, Kato A, Raymond B, Angelier F, Arthur B, Chastel O, Pellé M, Raclot T,  
946 Ropert-Coudert Y (2015) Habitat use and sex-specific foraging behaviour of Adélie  
947 penguins throughout the breeding season in Adélie Land, East Antarctica. *Movement*  
948 *ecology* 3:30
- 949 Wood S, Scheipl F, Wood MS (2017) Package ‘*gamm4*.’ *Am Stat* 45:339
- 950 Worton BJ (1989) Kernel methods for estimating the utilization distribution in home-range  
951 studies. *Ecology* 70:164–168
- 952
- 953
- 954
- 955

956 Table 1. Body measurements of male and female snow petrels and percentage of difference  
 957 between sexes for each measurement. For t-tests homogeneity of variances we checked using  
 958 a Brown and Forsythe tests (Brown and Forsythe 1974). The sample size is 47 individuals.

|                            | Sex    | Mean (SD)    | Range       | Difference | t-test                                           |
|----------------------------|--------|--------------|-------------|------------|--------------------------------------------------|
| Wing length (mm)           | Male   | 298.3 (6.8)  | 287.0-311.0 | 2.3%       | <b>t<sub>45</sub>=4.215</b><br><b>p&lt;0.001</b> |
|                            | Female | 290.0 (6.7)  | 280.0-302.0 |            |                                                  |
| Tarsus length (mm)         | Male   | 40.2 (1.2)   | 38.0-42.7   | 4.5%       | <b>t<sub>45</sub>=4.846</b><br><b>p&lt;0.001</b> |
|                            | Female | 38.4 (1.2)   | 35.9-41.0   |            |                                                  |
| Bill length (mm)           | Male   | 24.4 (1.0)   | 22.1-26.6   | 9.0%       | <b>t<sub>45</sub>=8.488</b><br><b>p&lt;0.001</b> |
|                            | Female | 22.2 (0.8)   | 20.9-23.7   |            |                                                  |
| Bill depth (mm)            | Male   | 10.8 (0.5)   | 9.6-11.8    | 8.3%       | <b>t<sub>45</sub>=6.408</b><br><b>p&lt;0.001</b> |
|                            | Female | 9.9 (0.4)    | 8.9-10.9    |            |                                                  |
| Body mass <sup>1</sup> (g) | Male   | 389.0 (30.4) | 331.5-464.0 | 10.3%      | <b>t<sub>45</sub>=6.014</b><br><b>p&lt;0.001</b> |
|                            | Female | 340.5 (24.0) | 300.0-385.0 |            |                                                  |
| Body mass <sup>2</sup> (g) | Male   | 431.4 (34.0) | 365.0-495.0 | 10.3%      | <b>t<sub>45</sub>=4.467</b><br><b>p&lt;0.001</b> |
|                            | Female | 387.0 (33.9) | 320.0-460.0 |            |                                                  |

959 <sup>1</sup>before a foraging trip; <sup>2</sup>on return from a foraging trip.

960

961

962

963

964

965

966

967

968

969

970

971

972

973 Table 2. Estimated overlap in utilization distributions (UD) between male and female snow  
974 petrels from Ile des Pétrels, Adélie Land, East Antarctica. UDOI: Utilization distribution  
975 overlap index. BA: Bhattacharyya's affinity

| UD (%) | Observed UDOI | Randomized UDOI | p     | Observed BA | Randomized BA | p     |
|--------|---------------|-----------------|-------|-------------|---------------|-------|
| 25     | 0.062         | 0.064           | 0.417 | 0.127       | 0.123         | 0.452 |
| 50     | 0.226         | 0.243           | 0.262 | 0.379       | 0.398         | 0.273 |
| 75     | 0.502         | 0.545           | 0.227 | 0.634       | 0.662         | 0.212 |
| 95     | 1.215         | 1.229           | 0.439 | 0.858       | 0.863         | 0.359 |

976

977

978

979

980

981

982

983

984

985

986

987

988

989

990

991

992

993

994

995 Table 3. Mean, maximum and variance in sea ice concentration, mean, minimum and  
 996 maximum bathymetry for foraging localities of male and female snow petrels from Ile des  
 997 Pétrels, Adélie Land, East Antarctica.

|                        | Sex    | Mean (SD)      | Range      | t-test                      |
|------------------------|--------|----------------|------------|-----------------------------|
| Mean SIC (%)           | Male   | 54.8 (14.6)    | 30.4-77.9  | <b>t<sub>44</sub>=2.600</b> |
|                        | Female | 44.0 (13.4)    | 16.8-72.5  | <b>p=0.013</b>              |
| Maximum SIC (%)        | Male   | 83.8 (16.8)    | 43.9-99.9  | t <sub>44</sub> =1.867      |
|                        | Female | 72.6 (23.8)    | 19.8-100.0 | p=0.069                     |
| Variance in SIC        | Male   | 375.7 (224.2)  | 69.5-840.2 | t <sub>44</sub> =1.772      |
|                        | Female | 264.0 (198.3)  | 3.9-749.9  | p=0.083                     |
| Mean bathymetry (m)    | Male   | 503.8 (248.7)  | 285-1490   | t <sub>45</sub> =0.911      |
|                        | Female | 582.4 (341.2)  | 259-1706   | p=0.367                     |
| Maximum bathymetry (m) | Male   | 1354.1 (632.1) | 809-2973   | t <sub>45</sub> =1.285      |
|                        | Female | 1617.4 (771.4) | 613-3223   | p=0.205                     |

998

999

1000

1001

1002

1003

1004

1005

1006

1007

1008

1009

1010

1011

1012

1013

1014

1015 Table 4. GAMM results for foraging probability of male and female snow petrels as a  
 1016 function of sea ice concentration (SIC), bathymetry (BAT) and spatial autocorrelation  
 1017 (s(x,y)).

| Variable                     | Sex    | Smoother edf (p value)   | Estimate (SE) | $\sigma^2$ (SE) |
|------------------------------|--------|--------------------------|---------------|-----------------|
| Intercept                    | Male   |                          | 3.543 (1.101) |                 |
|                              | Female |                          | 3.087 (1.365) |                 |
| SIC                          | Male   | <b>7.97 (&lt;0.001)</b>  |               |                 |
|                              | Female | <b>1.00 (0.003)</b>      |               |                 |
| BAT                          | Male   | <b>3.89 (&lt;0.001)</b>  |               |                 |
|                              | Female | <b>1.00 (0.044)</b>      |               |                 |
| s(x,y)                       | Male   | <b>22.96 (&lt;0.001)</b> |               |                 |
|                              | Female | <b>24.52 (&lt;0.001)</b> |               |                 |
| Random intercept for bird ID | Male   |                          |               | 10.250 (3.201)  |
|                              | Female |                          |               | 1.174 (0.343)   |

1018

1019

1020

1021

1022

1023

1024

1025

1026

1027

1028

1029

1030

1031

1032

1033 Table 5. GAM results for foraging intensity of male and female snow petrels as a function of  
1034 sea ice concentration (SIC) and bathymetry (BAT).

| Variable | Sex    | Smoother edf (p value)  | Scale | Adjusted R <sup>2</sup> |
|----------|--------|-------------------------|-------|-------------------------|
| SIC      | Male   | <b>4.99 (&lt;0.001)</b> | 2.50  | 0.223                   |
|          | Female | <b>4.11 (&lt;0.001)</b> | 2.25  | 0.663                   |
| BAT      | Male   | <b>6.47 (&lt;0.001)</b> | 16.01 | 0.779                   |
|          | Female | <b>6.82 (&lt;0.001)</b> | 9.28  | 0.863                   |

1035

1036

1037

1038

1039

1040

1041

1042

1043

1044

1045

1046

1047

1048

1049

1050

1051

1052

1053

1054



1055 Table 6. Stable isotope values in blood cells, plasma and feathers of male and female snow petrels sampled Ile des Pétrels, Adélie Land, East  
 1056 Antarctica. Values are mean  $\pm$  SD.  $SEA_B$  are Bayesian approximation of the standard ellipse area. Values in brackets indicate n and range for  
 1057  $\delta^{13}C$  and  $\delta^{15}N$ , and 95% credible interval for  $SEA_B$ . p indicates the probability that  $SEA_B$  of males and females differ. Sample sizes are 47  
 1058 individuals for blood cells and feathers, and 46 individuals for plasma.

| Tissue      | $\delta^{13}C(\text{‰})$             |                                      |                                                                 | $\delta^{15}N(\text{‰})$          |                                  |                                                                    | $SEA_B$             |                     | p     |
|-------------|--------------------------------------|--------------------------------------|-----------------------------------------------------------------|-----------------------------------|----------------------------------|--------------------------------------------------------------------|---------------------|---------------------|-------|
|             | Male                                 | Female                               |                                                                 | Male                              | Female                           |                                                                    | Male                | Female              |       |
| Plasma      | -25.46 $\pm$ 0.35<br>(-26.01;-24.56) | -25.66 $\pm$ 0.22<br>(-26.06;-25.26) | <b><math>t_{83}=2.105</math></b><br><b><math>p=0.039</math></b> | 12.11 $\pm$ 0.74<br>(10.70;13.38) | 11.49 $\pm$ 0.97<br>(9.04;12.83) | <b><math>t_{83}=3.418</math></b><br><b><math>p=0.001</math></b>    | 0.69<br>(0.45;0.99) | 0.79<br>(0.55;1.09) | 0.311 |
| Blood cells | -25.79 $\pm$ 0.21<br>(-26.13;-25.35) | -25.72 $\pm$ 0.27<br>(-26.13;-25.19) | $t_{83}=1.491$<br>$p=0.140$                                     | 10.65 $\pm$ 0.68<br>(9.37;12.17)  | 9.96 $\pm$ 0.65<br>(8.36;11.46)  | <b><math>t_{83}=5.568</math></b><br><b><math>p&lt;0.001</math></b> | 0.41<br>(0.29;0.55) | 0.39<br>(0.29;0.52) | 0.586 |
| Feather     | -23.68 $\pm$ 0.71<br>(-25.05;-22.06) | -23.50 $\pm$ 0.67<br>(-25.00;-22.49) | $t_{83}=0.335$<br>$p=0.738$                                     | 12.11 $\pm$ 1.35<br>(8.75;14.03)  | 11.34 $\pm$ 1.35<br>(8.61;14.10) | <b><math>t_{83}=4.289</math></b><br><b><math>p&lt;0.001</math></b> | 2.41<br>(1.72;3.28) | 2.65<br>(1.94;3.49) | 0.331 |

1059

1060 Table 7. Summary of foraging trip metrics for snow petrels from Ile des Pétrels, Adélie Land,  
 1061 East Antarctica.

|                                          | Sex    | Mean (SD)     | Range        | t-test         |
|------------------------------------------|--------|---------------|--------------|----------------|
| Trip duration (d)                        | Male   | 5.2 (1.8)     | 1.1-8.0      | $t_{45}=0.979$ |
|                                          | Female | 4.8 (1.9)     | 0.7-8.0      | $p=0.333$      |
| Trip length (km)                         | Male   | 851.6 (352.1) | 302.0-1957.5 | $t_{45}=0.292$ |
|                                          | Female | 856.4 (389.0) | 173.8-1803.8 | $p=0.772$      |
| Trip mean speed (km·h <sup>-1</sup> )    | Male   | 2.0 (0.6)     | 1.2-3.5      | $t_{45}=0.762$ |
|                                          | Female | 2.1 (0.4)     | 1.7-3.2      | $p=0.450$      |
| Trip maximum speed (km·h <sup>-1</sup> ) | Male   | 13.5 (2.6)    | 9.2-21.4     | $t_{45}=0.670$ |
|                                          | Female | 13.3 (2.5)    | 9.5-18.9     | $p=0.506$      |
| Trip start direction (°)                 | Male   | 161.5 (114.0) | 0.8-355.2    | $t_{45}=1.066$ |
|                                          | Female | 204.6 (143.2) | 2.6-348.6    | $p=0.292$      |
| Trip mean direction (°)                  | Male   | 190.9 (110.4) | 70.1-307.9   | $t_{45}=0.336$ |
|                                          | Female | 209.2 (117.6) | 68.8-342.7   | $p=0.739$      |
| Trip end direction (°)                   | Male   | 167.5 (114.0) | 46.9-282.8   | $t_{45}=0.773$ |
|                                          | Female | 184.8 (68.6)  | 102.9-291.6  | $p=0.444$      |

1062

1063

1064

1065

1066

1067

1068

1069

1070

1071

1072

1073

1074

1075

1076

1077

1078 Table 8. Summary of metrics of foraging trip efficiency for snow petrels from Ile des Pétrels,  
 1079 Adélie Land, East Antarctica.

|                                        | Sex    | Mean (SD)    | Range       | t-test                      |
|----------------------------------------|--------|--------------|-------------|-----------------------------|
| Mass at departure (g)                  | Male   | 389.0 (30.4) | 331.5-464.0 | <b>t<sub>45</sub>=6.014</b> |
|                                        | Female | 340.5 (24.0) | 300.0-385.0 | <b>p&lt;0.001</b>           |
| Mass at return (g)                     | Male   | 431.4 (34.0) | 365.0-495.0 | <b>t<sub>45</sub>=4.467</b> |
|                                        | Female | 387.0 (33.9) | 320.0-460.0 | <b>p&lt;0.001</b>           |
| BCI <sup>1</sup> at departure          | Male   | 377.1 (25.2) | 336.2-437.7 | <b>t<sub>45</sub>=2.633</b> |
|                                        | Female | 358.1 (24.0) | 321.3-414.1 | <b>p=0.012</b>              |
| BCI at return                          | Male   | 419.5 (31.2) | 372.5-479.3 | t <sub>45</sub> =1.636      |
|                                        | Female | 405.0 (29.3) | 361.0-458.4 | p=0.109                     |
| Δmass (g)                              | Male   | 42.4 (38.1)  | -20-110     | t <sub>45</sub> =0.392      |
|                                        | Female | 46.6 (34.6)  | -10-95      | p=0.697                     |
| Daily mass gain (g·day <sup>-1</sup> ) | Male   | 9.2 (8.2)    | -4.2-28.0   | t <sub>45</sub> =1.707      |
|                                        | Female | 14.6 (13.2)  | -2.0-45.0   | p=0.095                     |
| Proportion mass gain (%)               | Male   | 0.11 (0.10)  | -0.05-0.29  | t <sub>45</sub> =0.886      |
|                                        | Female | 0.14 (0.11)  | -0.03-0.31  | p=0.381                     |
| Proportion daily mass gain (%)         | Male   | 0.02 (0.02)  | -0.01-0.07  | <b>t<sub>45</sub>=2.064</b> |
|                                        | Female | 0.04 (0.04)  | -0.01-0.12  | <b>p=0.045</b>              |

1080 <sup>1</sup> Body Condition Index

1081

1082

1083

1084

1085

1086

1087

1088

1089

1090

1091

1092

1093

1094

1095

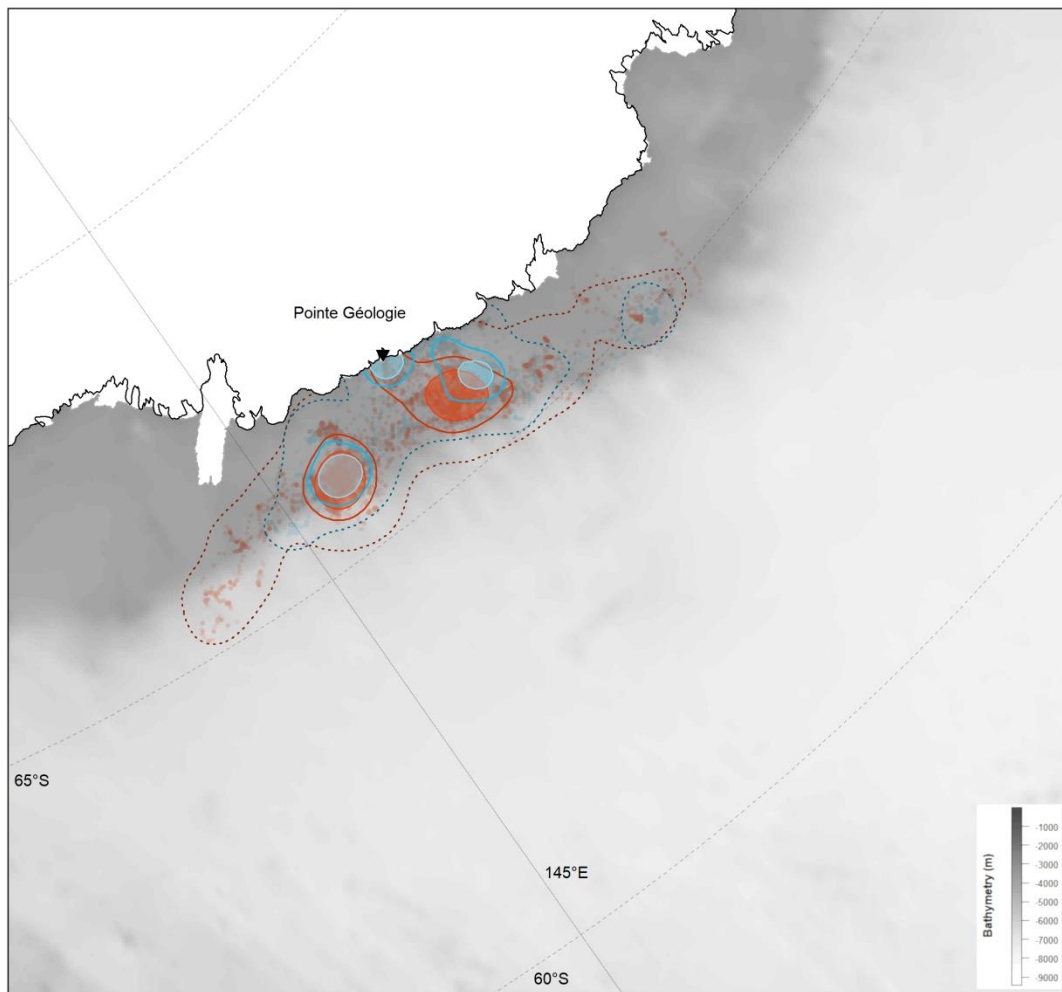

1096

1097 Figure 1. Foraging ranges of male (blue) and female (red) snow petrels during incubation

1098 sampled at Ile des Pétrels, Adélie Land, East Antarctica. Dots show raw location data. Kernel

1099 density based utilization distributions at 95% (dotted lines), 50% (solid lines) and 25% (filled

1100 areas). Bathymetry shown in grey and land in white. Ile des Pétrels is shown as a black

1101 triangle.

1102

1103

1104

1105

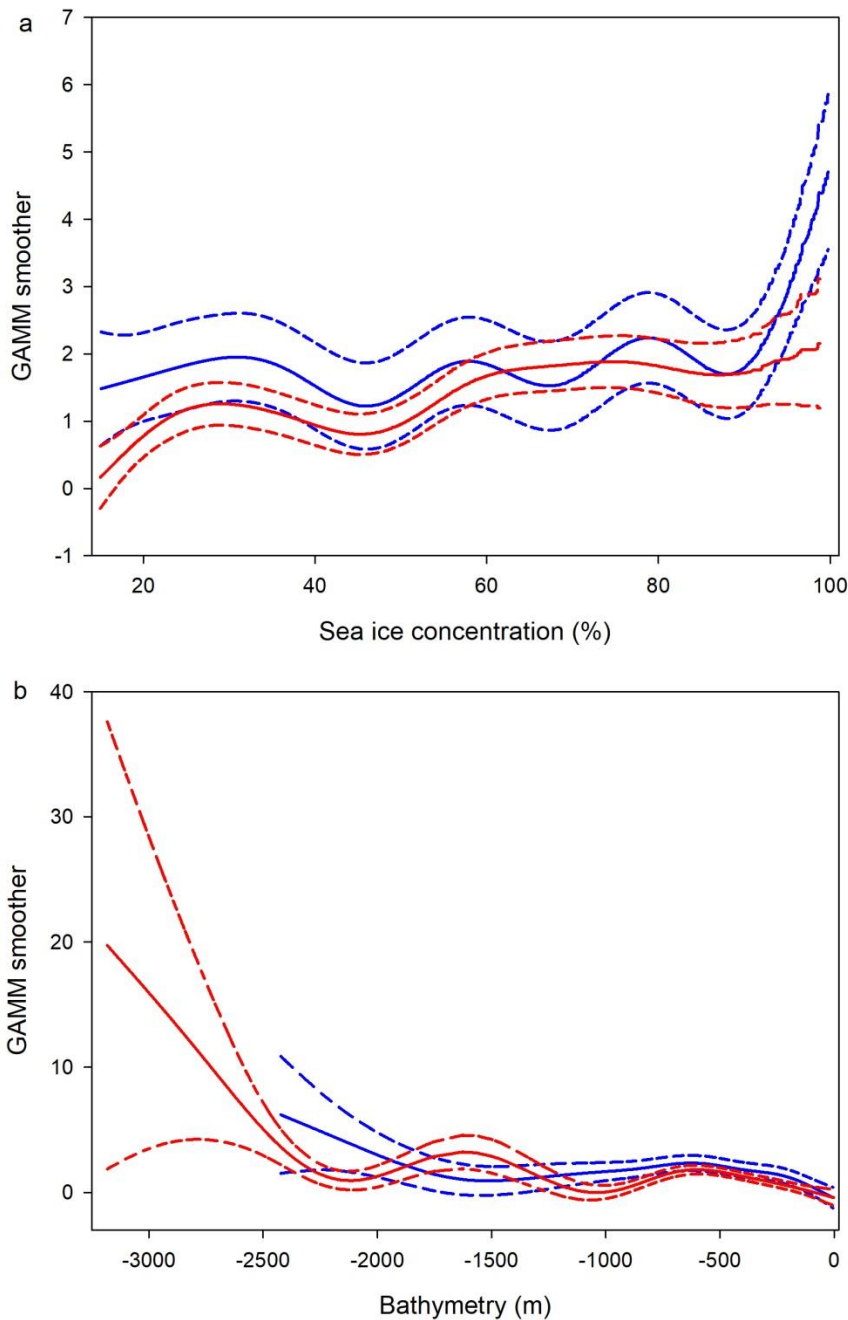

1106

1107 Figure 2. Foraging probability habitat selection functions for (a) sea ice concentration and (b)  
1108 bathymetry). Plots show the predicted curve from the model (solid line) and 95% confidence  
1109 intervals (dashed lines) for male (blue) and female (red) snow petrels sampled at Ile des  
1110 Pétrels, Adélie Land, East Antarctica. GAMM: generalized additive mixed model.

1111

1112

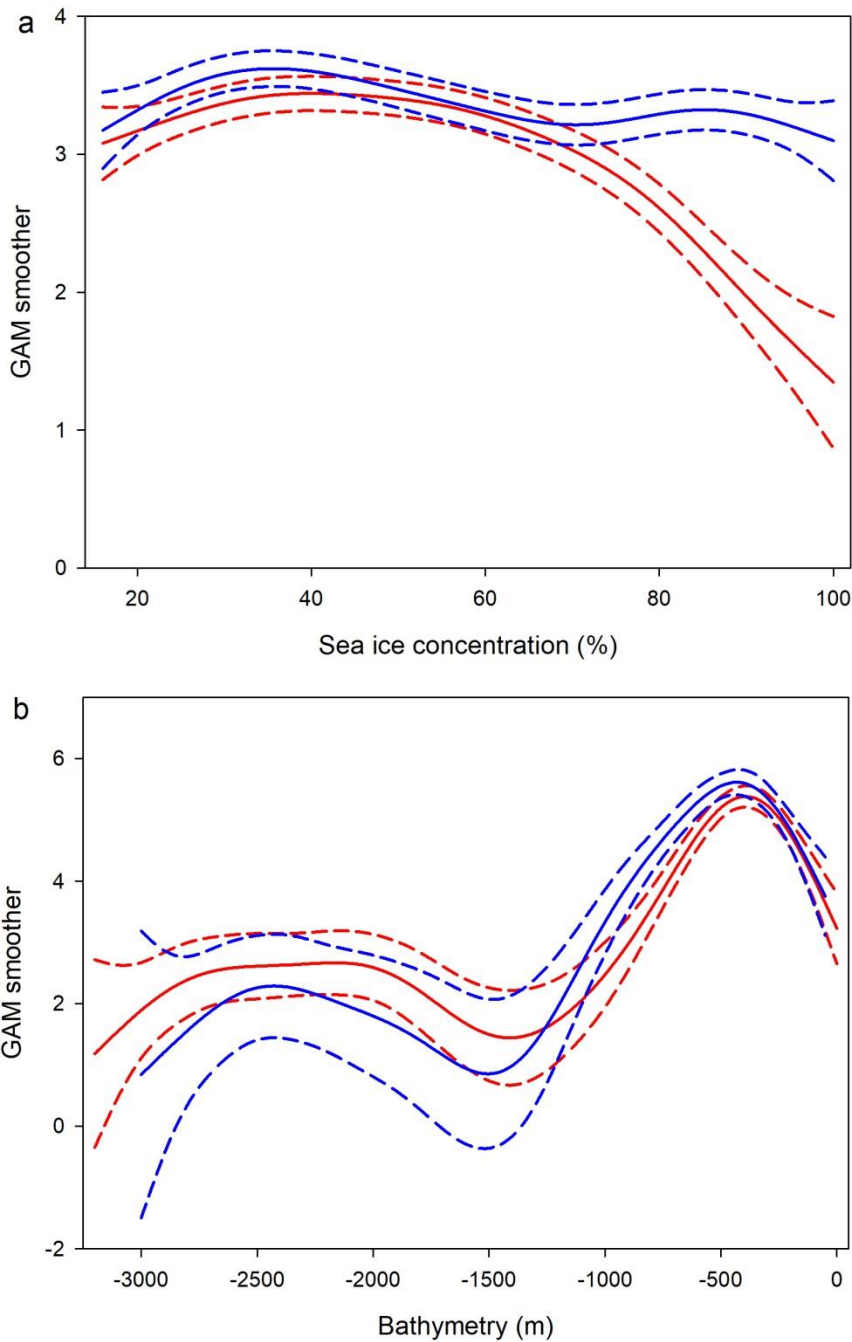

1113

1114 Figure 3. Foraging intensity habitat selection functions for (a) sea ice concentration and (b)  
1115 bathymetry). Plots show the predicted curve from the model (solid line) and 95% confidence  
1116 intervals (dashed lines) for male (blue) and female (red) snow petrels sampled at Ile des  
1117 Pétrels, Adélie Land, East Antarctica. GAM: generalized additive model.

1118

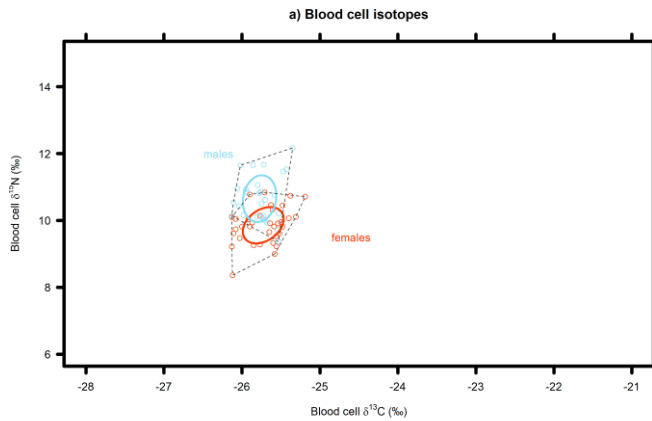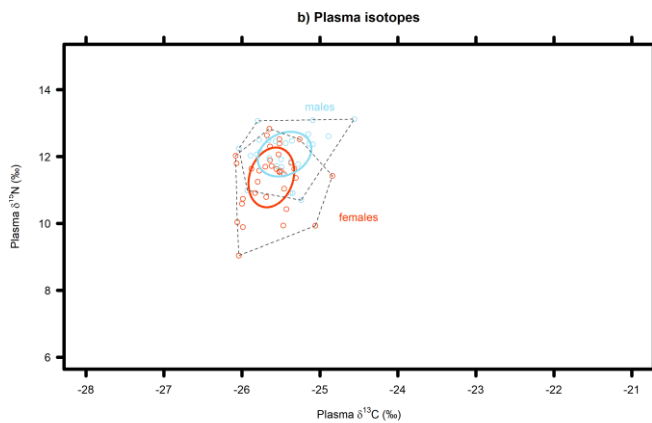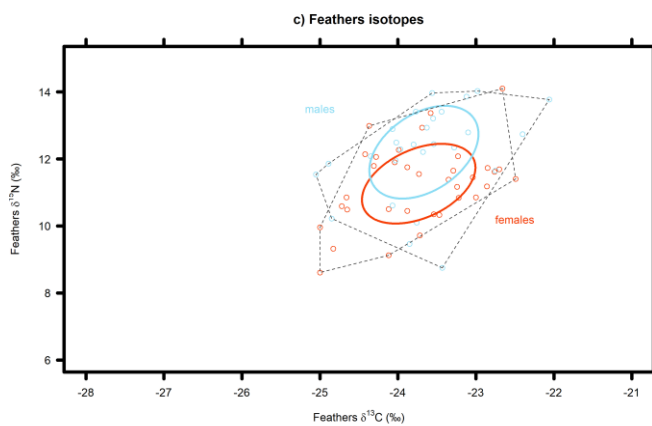

1122 Figure 4. Isotopic niche area based on stable isotope values ( $\delta^{15}\text{N}$  and  $\delta^{13}\text{C}$ ) in blood cells  
1123 (top), plasma (middle) and body feathers (bottom) of male (blue) and female (red) snow  
1124 petrels breeding at Ile des Pétrels, Pointe Géologie, Antarctica during the incubation period.  
1125 The areas of the standard ellipses are represented by the solid lines, and the layman metric of  
1126 convex hull area by black dotted lines.

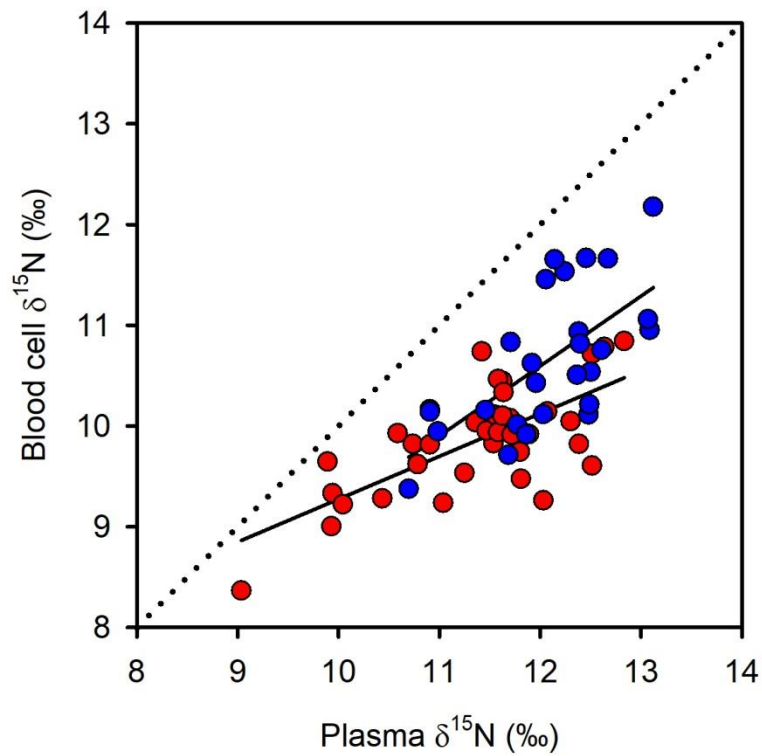

1127

1128 Figure 5. Relationships between blood cells and plasma  $\delta^{15}\text{N}$  values for male (n = 27, blue)

1129 and female (n = 35, red) snow petrels sampled at Ile des Pétrels, Adélie Land, East Antarctica.

1130 Males:  $F_{1,22}=15.203$ ,  $P<0.001$ ,  $R^2 = 0.409$ ; females:  $F_{1,20}=24.300$ ,  $P<0.001$ ,  $R^2 = 0.549$ .

1131



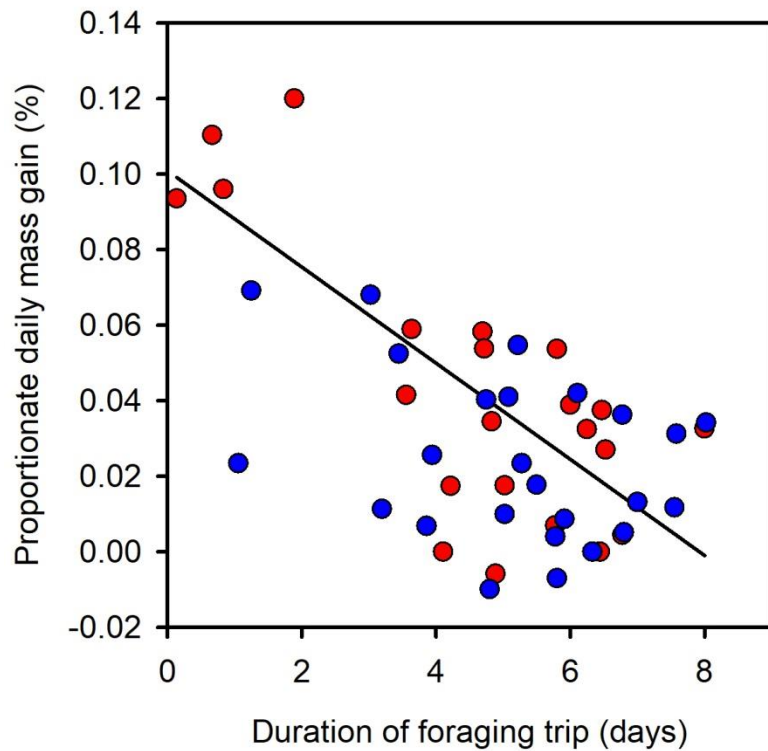

1132

1133 Figure 6. Foraging efficiency (proportionate daily mass gain while foraging) as a function of  
1134 the total duration of the foraging trip for male (blue) and female (red and solid line) snow  
1135 petrels sampled at Ile des Pétrels, Adélie Land, East Antarctica. For females:  $F_{1,20}=25.349$ ,  
1136  $P<0.001$ ,  $R^2 = 0.559$ .

1137

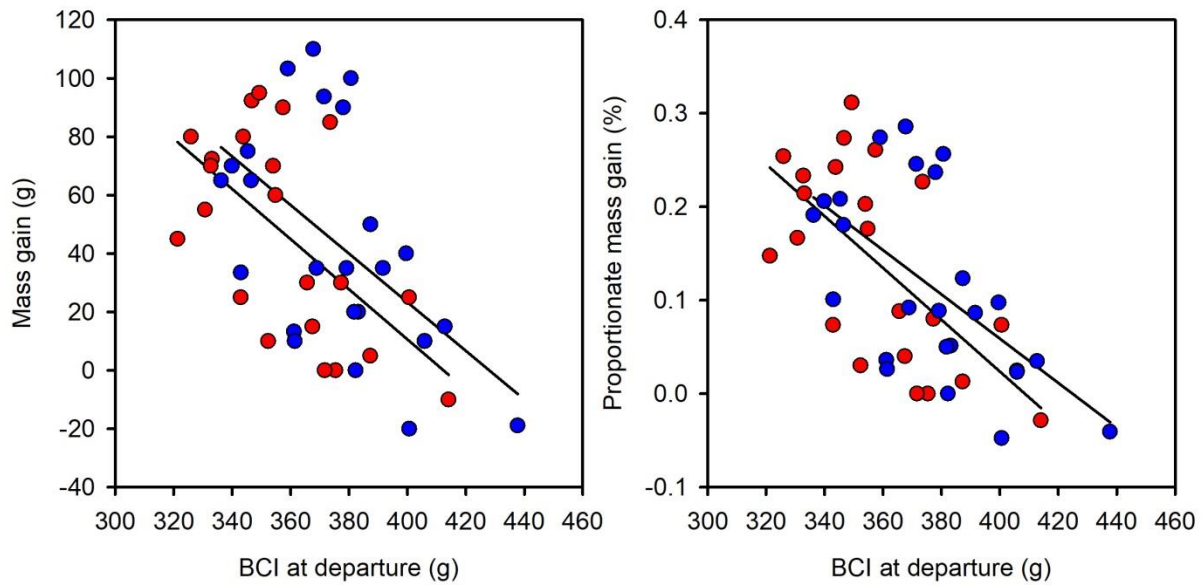

1138

1139 Figure 7. Mass gain and proportionate mass gain as a function of body condition before a  
1140 foraging trip for male (blue) and female (red) snow petrels sampled at Ile des Pétrels, Adélie  
1141 Land, East Antarctica. Male mass gain:  $F_{1,23}=10.010$ ,  $P=0.004$ ,  $r^2=0.303$ ; female mass gain:  
1142  $F_{1,20}=11.071$ ,  $P=0.003$ ,  $r^2=0.356$ ; male proportionate mass gain:  $F_{1,23}=12.361$ ,  $P=0.002$ ,  
1143  $r^2=0.350$ ; female proportionate mass gain:  $F_{1,20}=13.258$ ,  $P=0.002$ ,  $r^2=0.399$ .

1144

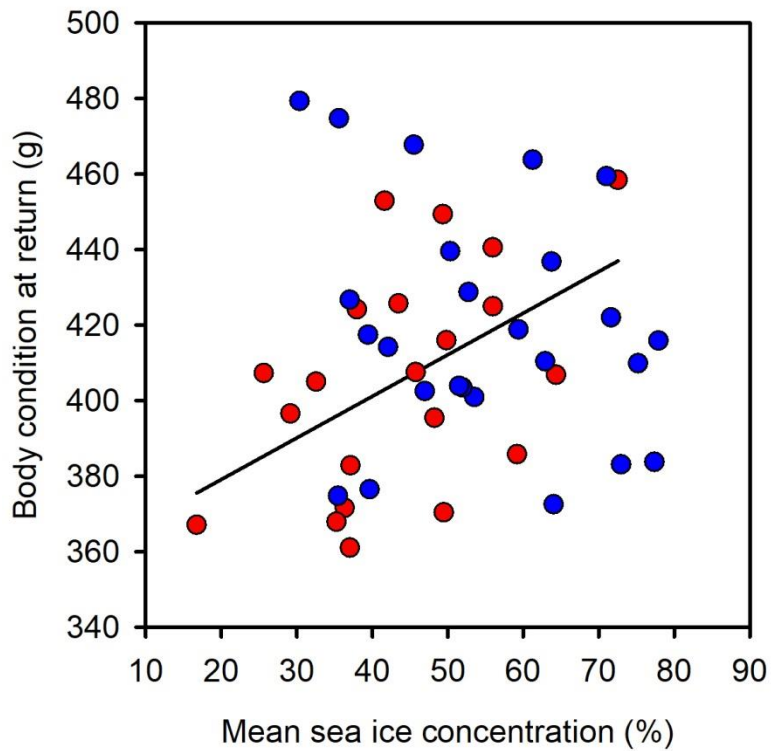

1145

1146 Figure 8. Body condition at return from a foraging trip as a function of the mean sea ice  
1147 concentration of the foraging trip locations for male (blue) and female (red and solid line)  
1148 snow petrels sampled at Ile des Pétrels, Adélie Land, East Antarctica. For females:

1149  $F_{1,19}=6.106$ ,  $P=0.023$ ,  $R^2 = 0.243$ .

1150

1151

1152

1153

1154

1155

1156

1157

1158

1159

1160 Appendix I. Testing for differences in  $\delta^{15}\text{N}$  (‰) and  $\delta^{13}\text{C}$  (‰) values between tissues for  
 1161 male and female snow petrels sampled Ile des Pétrels, Adélie Land, East Antarctica. t  
 1162 indicates Student's t-tests with df, Z indicates Wilcoxon rank test. \*\* indicates  $P < 0.01$ . \*\*\*  
 1163 indicates  $P < 0.001$ . Values above diagonal are for  $\delta^{15}\text{N}$  (‰), values below diagonal are for  
 1164  $\delta^{13}\text{C}$ (‰).  $\delta^{15}\text{N}$  (‰) and  $\delta^{13}\text{C}$  (‰) values in feathers were corrected following Cherel et al.  
 1165 (2014a) before comparison with blood cells.  $\delta^{13}\text{C}$  (‰) values for plasma were normalized  
 1166 following Post et al. (2007) and Cherel et al. (2014b).

|               | Plasma                | Blood                 | Feather             |
|---------------|-----------------------|-----------------------|---------------------|
| <b>Male</b>   |                       |                       |                     |
| Plasma        | -                     | $t_{47}=7.206^{***}$  | $t_{47}=0.008$      |
| Blood cells   | $Z=2.743^{**}$        | -                     | $t_{47}=3.060^{**}$ |
| Feather       | $t_{47}=17.166^{***}$ | $t_{47}=29.033^{***}$ | -                   |
| <b>Female</b> |                       |                       |                     |
| Plasma        | -                     | $t_{42}=0.039$        | $t_{42}=0.435$      |
| Blood cells   | $t_{42}=0.039$        | -                     | $t_{42}=2.967^{**}$ |
| Feather       | $t_{42}=23.219^{***}$ | $Z=4.107^{***}$       | -                   |

1167
